# Supplementary material for: Containment of Antibiotic REsistance—measures to improve antibiotic use in pregnancy, childbirth and young children (CAREChild): a protocol of a prospective, quasiexperimental interventional study in Lao PDR
Source: PubMed Central journal article supplement — BMJ Open. 2020 Nov 19;10(11):e040334. doi: 10.1136/bmjopen-2020-040334 (PMC7678367; doi:10.1136/bmjopen-2020-040334), 2020-11-19
Supplement: bmjopen-2020-040334.draft_revisions.pdf [file bmjopen-2020-040334.draft_revisions.pdf]

# BMJ Open

BMJ Open is committed to open peer review. As part of this commitment we make the peer review history of every article we publish publicly available.

When an article is published we post the peer reviewers' comments and the authors' responses online. We also post the versions of the paper that were used during peer review. These are the versions that the peer review comments apply to.

The versions of the paper that follow are the versions that were submitted during the peer review process. They are not the versions of record or the final published versions. They should not be cited or distributed as the published version of this manuscript.

BMJ Open is an open access journal and the full, final, typeset and author-corrected version of record of the manuscript is available on our site with no access controls, subscription charges or pay-per-view fees (<http://bmjopen.bmj.com>).

If you have any questions on BMJ Open's open peer review process please email [info.bmjopen@bmj.com](mailto:info.bmjopen@bmj.com)

# BMJ Open

## Containment of Antibiotic RESistance - measures to improve antibiotic use in pregnancy, childbirth and young children (CAREChild): a protocol of a prospective, quasi-experimental interventional study in Lao PDR.

|                               |                                                                                                                                                                                                                                                                                                                                                                                                                                                                                                                                                                                                                                                                                                                                                                                                                                                                                                                                                                                                                                                                                                                                                                                                                                                                       |
|-------------------------------|-----------------------------------------------------------------------------------------------------------------------------------------------------------------------------------------------------------------------------------------------------------------------------------------------------------------------------------------------------------------------------------------------------------------------------------------------------------------------------------------------------------------------------------------------------------------------------------------------------------------------------------------------------------------------------------------------------------------------------------------------------------------------------------------------------------------------------------------------------------------------------------------------------------------------------------------------------------------------------------------------------------------------------------------------------------------------------------------------------------------------------------------------------------------------------------------------------------------------------------------------------------------------|
| Journal:                      | <i>BMJ Open</i>                                                                                                                                                                                                                                                                                                                                                                                                                                                                                                                                                                                                                                                                                                                                                                                                                                                                                                                                                                                                                                                                                                                                                                                                                                                       |
| Manuscript ID                 | bmjopen-2020-040334                                                                                                                                                                                                                                                                                                                                                                                                                                                                                                                                                                                                                                                                                                                                                                                                                                                                                                                                                                                                                                                                                                                                                                                                                                                   |
| Article Type:                 | Protocol                                                                                                                                                                                                                                                                                                                                                                                                                                                                                                                                                                                                                                                                                                                                                                                                                                                                                                                                                                                                                                                                                                                                                                                                                                                              |
| Date Submitted by the Author: | 11-May-2020                                                                                                                                                                                                                                                                                                                                                                                                                                                                                                                                                                                                                                                                                                                                                                                                                                                                                                                                                                                                                                                                                                                                                                                                                                                           |
| Complete List of Authors:     | <p>Machowska, Anna; Karolinska Institute, Department of Global Public Health</p> <p>Sihavong, Amphoy ; Lao Ministry of Health, Vientiane Capital Health Department</p> <p>Eriksen, Jaran; Karolinska Institutet, Department of Global Public Health; Stockholm South General Hospital, Department of Infectious diseases/Venhälsan</p> <p>Vongsouvath, Manivanh; Mahosot Hospital, Lao-Oxford-Mahosot Hospital-Wellcome Trust Research Unit (LOMWRU), Microbiology Laboratory</p> <p>Marrone, Gaetano; Karolinska Institute, Department of Global Public Health</p> <p>Sychareun, Vanphanom; Lao University of Health Sciences, Faculty of Postgraduate Studies</p> <p>Hanson, Claudia; Karolinska Institute, Department of Global Public Health</p> <p>Keohavong, Bounxou; Lao Ministry of Health, Food and Drug Department</p> <p>Brauner, Annelie ; Karolinska Institute, Department of Microbiology, Tumor and Cell Biology</p> <p>Mayxay, Mayfong; Mahosot Hospital, Lao-Oxford-Mahosot Hospital-Wellcome Trust Research Unit (LOMWRU), Microbiology Laboratory; Lao University of Health Sciences</p> <p>Kounnavong, Sengchanh; Lao Tropical and Public Health Institute</p> <p>Lundborg, Cecilia; Karolinska Institute, Department of Global Public Health</p> |
| Keywords:                     | PUBLIC HEALTH, OBSTETRICS, GYNAECOLOGY, MICROBIOLOGY                                                                                                                                                                                                                                                                                                                                                                                                                                                                                                                                                                                                                                                                                                                                                                                                                                                                                                                                                                                                                                                                                                                                                                                                                  |

SCHOLARONE™  
Manuscripts

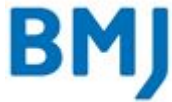

I, the Submitting Author has the right to grant and does grant on behalf of all authors of the Work (as defined in the below author licence), an exclusive licence and/or a non-exclusive licence for contributions from authors who are: i) UK Crown employees; ii) where BMJ has agreed a CC-BY licence shall apply, and/or iii) in accordance with the terms applicable for US Federal Government officers or employees acting as part of their official duties; on a worldwide, perpetual, irrevocable, royalty-free basis to BMJ Publishing Group Ltd ("BMJ") its licensees and where the relevant Journal is co-owned by BMJ to the co-owners of the Journal, to publish the Work in this journal and any other BMJ products and to exploit all rights, as set out in our [licence](#).

The Submitting Author accepts and understands that any supply made under these terms is made by BMJ to the Submitting Author unless you are acting as an employee on behalf of your employer or a postgraduate student of an affiliated institution which is paying any applicable article publishing charge ("APC") for Open Access articles. Where the Submitting Author wishes to make the Work available on an Open Access basis (and intends to pay the relevant APC), the terms of reuse of such Open Access shall be governed by a Creative Commons licence – details of these licences and which [Creative Commons](#) licence will apply to this Work are set out in our licence referred to above.

Other than as permitted in any relevant BMJ Author's Self Archiving Policies, I confirm this Work has not been accepted for publication elsewhere, is not being considered for publication elsewhere and does not duplicate material already published. I confirm all authors consent to publication of this Work and authorise the granting of this licence.

**BMJ Open\_200508\_V[final]****Containment of Antibiotic REsistance - measures to improve antibiotic use in pregnancy, childbirth and young children (CAREChild): a protocol of a prospective, quasi-experimental interventional study in Lao PDR.**

Anna Machowska<sup>1</sup>, Amphoy Sihavong<sup>2</sup>, Jaran Eriksen<sup>1,10</sup>, Manivanh Vongsouvath<sup>3</sup>, Gaetano Marrone<sup>1</sup>, Vanphanom Sychareun<sup>4</sup>, Claudia Hanson<sup>1</sup>, Bounxou Keohavong<sup>5</sup>, Annelie Brauner<sup>6</sup>, Mayfong Mayxay<sup>3,7,8</sup>, Sengchanh Kounnavong<sup>9</sup>, Cecilia Stålsby Lundborg<sup>1</sup>

<sup>1</sup>Department of Global Public Health, Health Systems and Policy, Karolinska Institutet, Tomtebodavägen 18A, 17 177 Stockholm, Sweden

<sup>2</sup>Vientiane Capital Health Department, Ministry of Health, Lao PDR

<sup>3</sup>Lao-Oxford-Mahosot Hospital-Wellcome Trust Research Unit (LOMWRU), Microbiology Laboratory, Mahosot Hospital, Vientiane, Lao PDR

<sup>4</sup>University of Health Sciences, Ministry of Health, Lao PDR

<sup>5</sup>Food and Drug Department, Ministry of Health, Vientiane, Lao PDR

<sup>6</sup>Department of Microbiology, Tumor and Cell Biology, Division of Clinical Microbiology, Karolinska Institutet and Karolinska University Hospital, 17 176 Stockholm, Sweden

<sup>7</sup>Institute of Research and Education Development (IRED), University of Health Sciences, Ministry of Health, Vientiane, Lao PDR

<sup>8</sup>Centre for Tropical Medicine and Global Health, Nuffield Department of Medicine, University of Oxford, Oxford, United Kingdom

<sup>9</sup>Lao Tropical and Public Health Institute, Ministry of Health, Vientiane, Lao PDR

<sup>10</sup>Department of Infectious diseases/Venhälsan, Stockholm South Hospital, 118 83 Stockholm, Sweden

Corresponding author:

Anna Machowska

Email: [anna.machowska@ki.se](mailto:anna.machowska@ki.se)

Phone: +46 (0) 8 524 833 84

**BMJ Open\_200508\_V[final]**

Department of Global Public Health, Health Systems and Policy, Karolinska Institutet, Tomtebodavägen  
18A, 17 177 Stockholm, Sweden

Key words: Antibiotics; antibiotic resistance; educational intervention; knowledge, attitudes, practice;  
maternal and child health.

For peer review only

1  
2  
3  
4  
5  
6  
7  
8  
9  
10  
11  
12  
13  
14  
15  
16  
17  
18  
19  
20  
21  
22  
23  
24  
25  
26  
27  
28  
29  
30  
31  
32  
33  
34  
35  
36  
37  
38  
39  
40  
41  
42  
43  
44  
45  
46  
47  
48  
49  
50  
51  
52  
53  
54  
55  
56  
57  
58  
59  
60

**BMJ Open\_200508\_V[final]****ABSTRACT**

**Introduction:** Antibiotics are life-saving medicines, essential to treat infections during pregnancy and to reduce both maternal and infant mortality. Overall use, but especially non-indicated use and misuse of antibiotics are key drivers of antibiotic resistance (ABR). Studies show alarmingly high non-indicated use antibiotic for normal vaginal deliveries in many parts of the world. Similarly, irrational use of antibiotics is reported for children. Little is known regarding antibiotic use and ABR in Lao PDR (Laos). This project aims to fill the knowledge gaps regarding antibiotic use in relation to pregnancy, childbirth and early childhood in Laos with the long-term aim to contain ABR.

**Methods and analysis:** This 3-year, prospective, quasi-experimental, interventional study contains formative and interventional phase. The formative phase started in September 2019. Data on knowledge, attitudes and reported practices (KAP) on antibiotic use in pregnancy, during delivery and for children are collected from women through repeated questionnaires during antenatal care visits and at home after birth. KAP questionnaires adapted to healthcare providers regarding administration of antibiotics for pregnant women, during delivery and for children are collected at health facilities. Perceptions regarding antibiotic use are explored through focus group discussions with women and individual interviews with key stakeholders. The planned intervention comprises training workshops, educational materials and social media campaign. The primary outcome is the proportion of uncomplicated vaginal deliveries where antibiotics are used. Faecal samples for culturing of *Escherichia coli* and *Klebsiella spp.* and antibiotic susceptibility testing are taken before, during and six months after delivery to determine colonization of resistant strains. The intervention has a potential to increase knowledge of healthcare providers and community, decreased unnecessary use of antibiotics and therefore limit the spread of ABR.

**Ethics and Dissemination:** Ethics approval was obtained from the National Ethics Committee for Health Research, Ministry of Health of Laos.

**BMJ Open\_200508\_V[final]****ARTICLE SUMMARY**

- This is the first study that address perceptions, knowledge, attitudes and practices regarding antibiotic use and antibiotic resistance among pregnant women and mothers of children under two and healthcare providers in Lao PDR, using interviews and records reviews.
- This is also the first study to collect data on antibiotic resistance carriage patterns of *Escherichia coli* and *Klebsiella spp.* among healthy pregnant women and their children in these settings.
- The intervention has a potential to have high societal implications such as increased knowledge of healthcare providers and community, decreased unnecessary use of antibiotics (especially for uncomplicated vaginal delivery), therefore containing the spread of antibiotic resistance.
- Last but not least, the results of this project are relevant to different end-users, such as researchers, local authorities, policy makers which may contribute to the development of national and local prescribing guidelines.
- A limitation is that study participants, both pregnant women and healthcare providers may tend to answer the questions about their practices in a way they think it is expected, therefore social desirability bias cannot be overruled and results may not be generalizable to other contexts.

**BMJ Open\_200508\_V[final]**

## INTRODUCTION

Antibiotics are life- saving medicines and important interventions in health systems (1). Misuse and overuse of antibiotics contribute to development and spread of antibiotic resistance (ABR)- one of the most pressing global health threats (2, 3). Antibiotic resistance contributes to increased morbidity, mortality and healthcare costs, and disproportionately impacts poorer countries where access to, and use of, antibiotics is frequently coupled with a high prevalence of infectious disease, exacerbating global economic inequalities (4). Antibiotic resistance is a complex process driven by many interrelated factors (5-7). To effectively mitigate the emergence and dissemination of ABR, pragmatic and collaborative actions are required including behavioural change interventions and infections prevention and control measures.

Antibiotics are essential to treat common infections during pregnancy, to prevent maternal and neonatal infections during delivery, and to treat infections arising from surgical wounds after caesarean sections (8, 9). Reports from Canada and The Netherlands showed that approximately 20–25% of women received antibiotics during pregnancy (10, 11). However, during pregnancy the use of any medicines, and specifically antibiotics is a risk-versus-benefit decision and needs to be carefully considered.

The use of antibiotics during the pregnancy delays final infant's gut colonization and during that time the infants are more susceptible to infections and to immune-mediated diseases (12, 13). This might result in increased antibiotic consumption in childhood and ultimately leads to increased ABR.

Use of antibiotics for uncomplicated vaginal delivery is generally not recommended (14), however some reports show alarmingly high use in these situations. For instance, data from India showed that 87% of women who had vaginal delivery received antibiotics and 28% were discharged from the hospital with prescribed antibiotics regardless the mode of the delivery (15).

Therefore, the use of antibiotics by the vulnerable groups e.g. children and pregnant women, has to be carefully monitored and evaluated bearing in mind side effects such as nausea, diarrhoea, or quinolone toxicity to the developing skeletal system.

The faecal microbiota serves as a reservoir for antibiotic resistance genes. Exposure of commensals such as *Escherichia coli* (*E.coli*) to antibiotics may increase the carriage levels of resistance genes and facilitate their spread to pathogenic strains of bacteria (16). So far, a few studies have looked at ABR in bacteria isolated from humans in Lao PDR (Laos), mainly in the capital city-Vientiane or province. One study from 2011 showed colonization of *Enterobacteriaceae* producing Extended Spectrum Beta-Lactamase (ESBLs) among 23% of healthy pre-school children (17). Another study from one of the major hospitals in Vientiane show increasing occurrence of ESBLs in bloodstream *E. coli* isolates (18). In contrast, case reports of colistin resistance (the last antibiotic option for multidrug resistant Gram-negative bacteria) showed a potentially severe situation relating to ABR in the country, however a structured study to support these results is needed (19).

While there is some evidence of irrational antibiotic use, studies on antibiotic use among children in Laos have, to our knowledge, not been conducted. Also, data regarding antibiotic use during pregnancy



**BMJ Open\_200508\_V[final]**

and childbirth in Laos are scarce. Data from 2008 (*Sihavong A, et al, unpublished*), showed that from 300 women with normal vaginal deliveries, 79% delivered at home, of those 25% used antibiotics and among women who delivered in hospitals 79% received antibiotics. Since then the quality of ANC has improved, is free of charge and attendance to ANC has increased. Data from Lao Social Indicators survey from 2017 shows that 65% of women delivered at health facilities and more than 80% attended ANC at least once.

In this study protocol we present the scheme of ongoing data collection, plan for data analysis and implementation and evaluation of the intervention targeted to healthcare providers (HCPs) and community.

The project Containment of Antibiotic REsistance - measures to improve antibiotic use in pregnancy, childbirth and young children (CAREChild) is an international project between partner institutions in Laos and Sweden that aims to understand and improve antibiotic use in relation to pregnancy, childbirth and early childhood in Laos with the long-term aim to contain ABR.

The specific objectives are to:

- Estimate the proportion of uncomplicated vaginal deliveries where antibiotics are used.
- Explore and assess perceptions, knowledge, attitudes, and reported practice of pregnant women, and mothers of children under two regarding antibiotic use and resistance in relation to pregnancy, childbirth, and children under two years of age.
- Explore and assess perceptions, knowledge, attitudes, reported practice, as well as actual practice of HCPs regarding antibiotic use and resistance in relation to pregnancy, childbirth, and children under two years of age.
- Estimate the antibiotic resistance situation with focus on ESBLs producing and multi drug resistant *E. coli* and *Klebsiella spp.* carriage in faecal samples among women and children.
- Develop and test interventions aimed at HCPs and community members to improve use of antibiotics.

We hypothesise that educational intervention will reduce the antibiotics administered for uncomplicated vaginal deliveries and lead to an improvement in knowledge regarding antibiotic use and resistance of both community and HCPs.

**METHODS AND ANALYSIS: STUDY DESIGN AND DATA COLLECTION***Study design*

This is a 3-year, prospective, quasi-experimental, interventional study with both continuous and repeated data collection. The study starts with an extensive formative phase leading to the development of an intervention, which will be evaluated through time series analysis. In the formative phase potential barriers and facilitators for implementing the intervention are identified. Collected data inform about the context, adaptations, and response to change of HCPs and the community behaviours in relation to

**BMJ Open\_200508\_V[final]**

antibiotic use. Quantitative and qualitative data are collected before (formative phase) and after the intervention at all health facilities and in the community.

*Study settings*

The study is conducted in Laos, a lower middle-income country in Southeast Asian with approximately 7 million inhabitants and relatively low population density (20). Laos has 17 provinces, one capital city, 148 districts and 8459 villages. Around two third of the population lives in rural areas and relies on agricultural work, specifically rice farming. Individual villages in Laos tend to be home to a particular ethnic group (21). Feuang and Vangvieng districts in Vientiane Province in the central part of the country have been selected as study areas based on variations in background characteristics, representing different ethnic minority population and for feasibility reasons. In order to better understand the current situation of antibiotic use and ABR, all levels of healthcare facilities i.e. Vientiane provincial hospital, two district hospitals and six health centres in each of the two study districts are purposively selected as the study sites. To avoid contamination, the qualitative part of the study before the intervention is conducted in Thulakhom district (Vientiane province) which is outside the study area. For the same reason the pilot study took place in Phonehong (Vientiane province) and Santhong districts (Vientiane Capital). List of the study sites can be obtained on request from the local principal investigator.

*Inclusion criteria for women*

1. All pregnant women in the 3<sup>rd</sup> trimester, who after the enrolment plan to stay in the area for the next 24 months, who are willing to participate in the study, and whose infants are born during the study period.

*Inclusion criteria for HCPs*

1. All medical doctors, assistant doctors, midwives, nurses, pharmacists, assistant pharmacists at the Vientiane provincial hospital, district hospitals or health centres in Feuang or Vangvieng as well as drug sellers (only pharmacists and assistant pharmacists) at private pharmacies in these districts.
2. For individual qualitative interviews: private providers (in private clinics and pharmacies) in the study area, representatives from central level such as Ministry of Health, university and professional organizations in addition to providers from the public healthcare facilities, HCPs and policy makers from the Maternal and New-born Hospital (MNH) in Vientiane capital, where women from different parts of the country come for ANC and consultation.

**BMJ Open\_200508\_V[final]***Data collection: pilot study*

Building on the research team's experiences (15, 22) and expertise of the local team, the data collection instruments were developed in English, adapted for different target groups and translated to Lao. In March 2019 a pilot study was conducted to field test the data collection instruments and procedures to train data collectors. In total, 30 questionnaires on knowledge, attitudes and reported practices were pilot tested with 10 HCPs, 10 pregnant women and 10 mothers of a child under two. In parallel, to capture perceptions, focus group discussion (FGD) and qualitative interview guides were tested during 1 FGD with mothers and 1 FGD with pregnant women and 4 interviews with HCPs. Preliminary results from the pilot test have guided the final version of data collection instruments and shed light on possible components and acceptability of the intervention. A summary of the data collection instruments used in the study is presented in Table 1. Full baseline data collection was initiated in September 2019.

*Quantitative data collection*

Repeated structured interviews on knowledge, attitude and reported practice regarding antibiotic use, ABR and antibiotic side effects are performed with women at 3 time points i.e. before the intervention (during pregnancy and 6 months after delivery) and after the intervention.

HCPs are interviewed about their knowledge, attitudes and reported practice regarding antibiotic use for pregnant women, delivery and for children before and after the intervention. Simultaneously, data on antibiotic use during delivery are continuously collected from patient records in all included health facilities.

The baseline interviews with expecting mothers and HCPs were performed at ANC visit between September 2019 and February 2020. The follow up questionnaires with the women after delivery will be performed during the routine vaccination scheme visit or if not possible in the household. HCPs are interviewed at their workplace.

To capture additional information on self-reported use of antibiotics, several forms have been developed and attached to the ANC booklet- a booklet received at the beginning of pregnancy and where all pregnancy related information are recorded by HCP (Table 1). Pregnant women are asked to report all medicines taken regularly to improve overall health status, prevent disease or treat chronic condition (e.g. folic acid, iron, herbs) or occasionally for any episode of illness (e.g. antibiotic, paracetamol, herbs). Similarly, a regular and occasional use will be reported by mothers for their children. Additionally, we are collecting data on the last clinical examination of pregnant woman and/or a child. The forms are to be filled by a HCP at each occasion when a pregnant woman and/or child seeks for health care with symptoms of illness. The forms are collected monthly from the ANC booklet by a designated person at each health care facility, stored in a secure place and then collected by the study team.

**BMJ Open\_200508\_V[final]***Qualitative data collection*

FGDs are organized to discuss women's perceptions of antibiotic use, ABR and side effects during pregnancy, childbirth and for children. Before the intervention 6 FGDs (3 with pregnant women and 3 with mothers with children under two years of age) were organized in Thulakhom district.

Individual qualitative interviews are conducted with a range of stakeholders to explore their views on antibiotic use, ABR, side effects of antibiotic use during pregnancy, childbirth and for children as well as infection prevention and control measures. Before the intervention 30 stakeholders were interviewed: 9 at central and provincial level, and 12 at district level. After the intervention the FGDs and interviews will be conducted with similar number of participants until data saturation is reached.

*Recruitment*

The pregnant women are identified via the local health registry of ANC, and invited to participate during their ANC visit. All HCPs working in the study sites are invited to participate and are notified via local health staff name list. Women who participate in FGDs before the intervention are identified during postpartum visit and/or child vaccination visit and approached by local health staff. Stakeholders for individual qualitative interviews are identified and recruited via local health staff name list.

*Data collection performance*

The data collection team comprises: 4 Master's students from Lao Tropical and Public Health Institute, 4 staff members from the same Institute and 4 staff members from the University of Health Science in Vientiane who speak the local language. All data collectors participated in a 1-week long training before the initiation of data collection in September 2019. The training consisted of lectures on qualitative and quantitative methodology, practical sections on using electronic platform for data collection with tablets, practical session on qualitative interviews, standard operating procedures for each question, microbiology samples collection and field management. Data collectors are conducting both quantitative and qualitative interviews and act as moderators and note takers in FGDs.

**METHODS AND ANALYSIS: INTERVENTION***Educational intervention*

The results from the pilot study and formative phase, combined with the experience in educational interventions of the research team (23, 24) feed in the development of a contextual educational intervention. The educational package aims to decrease unnecessary antibiotic use for uncomplicated vaginal deliveries and during pregnancy, increased knowledge and indirectly limit the spread of ABR. The pilot educational intervention will be conducted in Feuang district due to feasibility reason and faster availability of baseline data, will start immediately after follow up data collection and will last 3 months. After completion of the intervention the research team aims to sustain some of the intervention activities e.g. posters display. The project timeline is presented in Figure 1.

**BMJ Open\_200508\_V[final]**

The intervention consists of several components tailored to HCPs and community:

1) A participatory, iterative process-based model for improvement will be used as a conceptual framework for developing, testing and implementing changes in the proposed intervention. The Plan-Do-Study-Act cycle allows to test out changes on a small scale, building on the learning from these cycles in a structured way before the full-scale implementation (25).

Results from the formative phase showed that almost all HCPs have access to a mobile phone and would accept an intervention provided via online platforms or social media. Although there are several treatment guidelines in place at the national level, there are no specific guidelines regarding intrapartum antibiotic use. Therefore, several interventional components will be targeted to HCPs.

a) Educational workshops with a key content on selection of antibiotics per indication, use of broad vs narrow spectrum antibiotics and feedback on qualitative and quantitative findings. Workshops will be delivered by a facilitator using power point, case studies, presentation of support tools (e.g. alcohol-based hand rub) and role playing. These workshops will take place at several occasions during 3 months intervention period and the facilitator will use Train the Trainers approach.

b) Educational tools (leaflets, handouts) regarding antibiotic use during pregnancy, childbirth and for children, ABR, infection prevention and control will be developed and provided by the study team to each HCPs via both traditional (at health care facilities) and online channels.

c) Short, acceptable messages will be developed and send regularly from a trusted source (i.e. Lao Tropical and Public Health Institute) via WhatsApp to all HCPs who participated in the workshops.

In addition, a revision of existing curricula for HCPs educational tracks and if needed initiation of recurrent training regarding intrapartum antibiotic use will take place. A collaboration with national Obstetrics and Gynaecology Association will be initiated to work on the development of local prescribing guidelines.

2) Women are usually the main caregivers of the children and often the main decision-makers regarding health care seeking behaviour, and have a great impact on the use of antibiotics among pregnant women and children. Simple and inexpensive interventions using short text messages have been widely used in LMICs and some of them showed to be a potent tool for behavioural change (26-29). The results from the formative phase showed that initially planned mHealth intervention will not be feasible to target community members. Mobile phone ownership is as low as 30% among the rural population and the male, head of household, often is in charge of the phone. Therefore, the following intervention components will be used:

a) Educational workshops that will cover broad range of topics e.g. antibiotic use during pregnancy, hygiene and self-care during pregnancy and delivery (in case of home deliveries) and after delivery, breastfeeding and other feeding practices, vaccinations, caring for a sick child, antibiotic use for children. The workshops will be organized in the villages at several occasion during the intervention

**BMJ Open\_200508\_V[final]**

period, delivered by a facilitator and supported by local health staff. We also aim to ask local Lao Women's Union to support and endorse the activities.

b) Several well accepted communication channels such as posters and radio campaigns to convey the key message on prudent antibiotic use during pregnancy and for children will be used. Posters will be displayed in villages e.g. around intersections or by residents' gathering places, such as the door of the supermarket or village clinic or pharmacy, or outer wall of a house located on the main road. Radio campaigns will be designed and delivered as a short role-playing scenarios e.g. newly delivered women and HCPs talking about need for antibiotics after delivery in decided broadcasting time.

*Evaluation of the intervention**Primary outcome*

The primary outcome of the study is the proportion of uncomplicated normal deliveries for which antibiotics were used. Data on antibiotic use for each delivery are collected from patient records at included health facilities for 12 months before, during and 12 months after the intervention. The impact of the intervention will be evaluated through time series analysis.

*Secondary outcomes*

- Knowledge, attitudes and reported practices regarding antibiotic use during pregnancy and for children and ABR of pregnant women and mothers.
- Knowledge, attitudes and reported practices regarding antibiotic use for pregnant women, during delivery and for children and ABR of HCPs
- Proportion of children under 2 years of age where antibiotics have been used.
- Proportion of samples with ESBL or multi drug resistant producing bacteria and other relevant resistances pattern to tested antibiotics (only pre-intervention phase).
- Proportion of caesarean section deliveries where antibiotics are given.

Following the completion of the intervention phase, mothers and HCPs will be interviewed again using the same questionnaires as at the pre-intervention to evaluate the change in their knowledge, attitudes and practices. To evaluate if the intervention was carried out as planned and detect the strengths and weaknesses of the programme, several process indicators data will be collected. We will monitor number of participants, number of booklets, handouts and posters printed and distributed. A local research team will use a process evaluation form to monitor the intervention with local partners. After the workshops both HCPs and community members will be given a questionnaire to collect their reflections on the provided content.

**METHODS AND ANALYSIS: MICROBIOLOGY ANALYSIS AND METHODS***Microbiology samples collection and analysis*

**BMJ Open\_200508\_V[final]**

We aim to estimate the prevalence of faecal carriage of ESBL producing and multi drug resistant *E. coli* and *Klebsiella spp.* Rectal swabs will be collected from all pregnant women before delivery, during delivery from women and their newborn children (meconium) and 6 months after delivery from mothers and their children. Should taking samples during delivery not be possible, they will be taken at home within 7 days after delivery. Rectal swabs will be collected at each health facility in Feuang district by either HCP or mother herself and transported to the district hospital in a cold box with icepack to keep temperature around 2-4°C. After collecting samples in the district hospital, they will be transported to the microbiology laboratory of the Mahosot hospital in Vientiane capital, maintaining the cold chain as appropriate. After arrival, samples will be stored at 4°C until processing. All samples will be processed within 14 days after sampling.

Rectal swabs will be used for culturing on Brilliance UTI Agar (bioMerieux), where *E. coli* will appear as red or pink colonies and *Klebsiella spp.* as dark blue colonies. Species identification will be performed biochemically. Those confirmed as *E. coli* or *Klebsiella spp.* will be screened for ESBL using cefpodoxime. The suspected ESBL strains will be further tested using ceftazidime with and without clavulanic acid and cefotaxime with and without clavulanic acid. In the next step all positive ESBL producing strains will be tested against common antibiotics using disk diffusion susceptibility test: ampicillin, amoxicillin/clavulanic acid, ceftriaxone, meropenem, gentamicin, amikacin, trimethoprim/sulfamethoxazole, cefpodoxime, chloramphenicol, ciprofloxacin, tetracycline. Antibiotic susceptibility testing will be performed by standardised disk diffusion method (CLSI, 2018). In parallel, swabs will be cultured on CHROMID® CARBA (bioMerieux) for detection of Carbapenemase-Producing *Enterobacteriaceae*. ESBL-producing/CARBA medium isolates of *E. coli* and *Klebsiella spp.* will be stored at -80°C for future analysis.

**METHODS AND ANALYSIS: DATA MANGEMENT AND ANAYSIS***Electronic data collection, data management and data quality control*

All quantitative data are collected and managed electronically using Research Electronic Data Capture (REDCap) (30) tool hosted at Karolinska Institutet. REDCap is a secure, web-based application designed to support data capture for research studies, providing audit trails for tracking data manipulation and export procedures. Data collection instruments were developed in REDCap and, where appropriate, consisted pre-determined checks and range validations. For in-the-field data collection purpose, instruments are exported onto Samsung tablets (Samsung Galaxy Tab. 3 V, Seoul, South Korea) equipped with mobile internet access. Data collected via tablets are cross-checked before synchronization with the REDCap server. Data collected via paper forms are cross-checked for completeness and entered directly to REDCap server by data key entry person. Data quality checks are run weekly by data manager who tracks information such as form completion, internal consistency, data range and eligibility criteria. Feedback is regularly communicated with data collectors and study team to assure consistent, high quality data collection.

**BMJ Open\_200508\_V[final]**

Qualitative data are audio-recorded, transcribed verbatim and checked with recorder version.

*Sample size*

Considering an estimated 79% for the main outcome measure of the study (proportion of uncomplicated deliveries in the hospital where antibiotics are given) (*Sihavong A et al., 2008 unpublished*), with a 95% confidence interval, a sample size of 450 deliveries would allow us to have a confidence interval with a width equal to 4%. Therefore, to allow a loss to follow up of 25%, 600 women is included.

*Data analysis*

Statistical analysis will be performed using STATA version 15.1 (College Station, Texas, USA). Descriptive analyses will include frequencies for categorical variables, mean and standard deviation or median and inter- quartile range for continuous variables. Chi-square test will be used to compare two categorical variables, t-test or Mann–Whitney U test will be used to compare a numerical variable in two groups, while when comparing a numerical variable among three or more groups ANOVA or Kruskal–Wallis test will be used. Interrupted time series analysis will be used to compare the trend in the proportion of the primary outcome of interest the 12 months before the planned intervention and 12 months after it. Moreover, in order to compare knowledge and attitudes of mothers and HCPs (pre-post intervention) we will use multilevel mixed-effects generalized linear models (Stata command `meglm`) with different family distributions according to the outcome distribution (Stata option `family`). Results will be presented as effect estimates with 95% confidence intervals and will primarily be done both together and separately for each health care facility. Interaction test will be performed if relevant. P-values less than 0.05 will be considered significant in the final analysis.

Manifest and latent qualitative content analysis will be applied for the qualitative data analysis (31).

*Study status*

Data collection started in September 2019, is ongoing and will continue until the end of 2021 followed by data analysis and dissemination of results.

**ETHICS AND DISSEMINATION****Ethics**

The project received ethical approval from the National Ethics Committee for Health Research, Ministry of Health of Laos (031/NECHR dated 27 March 2019). All study participants received information about the aim of the study and their role as participants and they were asked for a written consent (appendix). They were informed that participation is voluntary and that they are free to withdraw from the study at any time without experiencing any repercussions.

The research team takes several measures to assure participants' confidentiality throughout the study. During structured interviews no information that may compromise participant's identity will be



**BMJ Open\_200508\_V[final]**

1  
2  
3 collected. A unique participant's ID code will be generated for each participant and will be used for data  
4 collection and analysis. The unique identifier will be stored separately and accessible only to a data  
5 manager. Moreover, all participants of the FGDs and qualitative interviews will be asked to refrain from  
6 sharing information about what was said during the FGDs and interviews. Although we are aware that  
7 this cannot be guaranteed from all participants, it will be guaranteed from the research team side. The  
8 participants will be informed that the qualitative interviews and FGDs are recorder. All data will be  
9 stored in cloud-based repositories. Data safety, sharing and protection will be agreed on during  
10 consultative meetings in line with national legislation.

11 Risk and benefits for the study participants have been carefully considered. During the data collection  
12 process, we interview pregnant women and mothers of young children about their knowledge, attitudes  
13 and practices regarding antibiotic use and ABR. There is a risk that some questions may be perceived  
14 as intimidating and cause stress, since women may be afraid that investigators are questioning their  
15 knowledge and practices. For HCPs, participation in the study may cause additional workload related to  
16 answering interview questions and filling up additional the forms.

17 However, we believe that the short and long- term outcomes of the study overcome the possible risks  
18 attributable to this study. All researchers involved in the study will work together to minimize potential  
19 risks and stress factors for the study participants at the same time assuring them of the benefits.

**Dissemination Plan**

20 Findings from this project will be disseminated to a range of stakeholders in addition to traditional peer-  
21 reviewed international or national journal articles, conference presentations (Lao National Health  
22 Research Forum), consortium meetings, symposia and networking events. As part of the project  
23 implementation process, we will feedback results to local stakeholders, authorities, policy makers and  
24 community members via various recognized communication channels. The local consortium partners  
25 will be responsible to assure the successful communication with relevant stakeholders. In addition, if  
26 feasible and appropriate dissemination through mass media will be done.

## BMJ Open\_200508\_V[final]

Table 1 Data collection tools used in the CAREChild project

| DATA COLLECTION TOOL                            | TARGET DATA SOURCE/PARTICIPANT                                                                                                                              | TIME POINT AND PLACE OF DATA COLLECTION                                                                                                                                                                                                                                                                                     | OUTCOME VARIABLE                                                                                                                          |
|-------------------------------------------------|-------------------------------------------------------------------------------------------------------------------------------------------------------------|-----------------------------------------------------------------------------------------------------------------------------------------------------------------------------------------------------------------------------------------------------------------------------------------------------------------------------|-------------------------------------------------------------------------------------------------------------------------------------------|
| <b>Structured interview</b>                     | 1) Pregnant women<br><br>2) Mothers<br><br>3) HCPs                                                                                                          | 1) At pre-intervention phase, collected during ANC visit<br><br>2) At pre-intervention phase, collected 6 months after the delivery during a vaccination visit; and at post-intervention phase, collected during home visit<br><br>3) At pre- intervention and at post-intervention phase, collected at the health facility | Knowledge, attitudes and reported practices regarding antibiotic use and resistance                                                       |
| <b>Self-reported practice form</b>              | 1) Pregnant women<br><br>2) Mothers                                                                                                                         | 1) At pre-intervention phase, attached to the ANC booklet and filled in on a monthly basis<br><br>2) At pre and post-intervention phase, attached to ANC booklet                                                                                                                                                            | 1) Self-reported practice on medicines used during pregnancy<br><br>2) Self-reported practice on medicines use for a child                |
| <b>Medical examination and prescribing form</b> | 1) Pregnant women<br><br>2) Mothers (children)                                                                                                              | 1) At pre-intervention phase, during consultation with a HCP<br><br>2) At pre and post-intervention phase, during consultation with a HCP                                                                                                                                                                                   | 1) Medicines prescribed to pregnant women while seeking medical help<br><br>2) Medicines prescribed to a child while seeking medical help |
| <b>Records review form</b>                      | Pregnant women                                                                                                                                              | Records review in the included health facilities, 12 months pre and 12 months post-intervention                                                                                                                                                                                                                             | Antibiotic administration during delivery                                                                                                 |
| <b>Key stakeholders qualitative interviews</b>  | All relevant HCPs (doctors, nurses, midwives, private providers), drug sellers and policy makers (Ministry of Health, professional association, university) | At pre and post-intervention phase, interviews at the workplace of key stakeholder                                                                                                                                                                                                                                          | Perceptions of HCPs and policy makers towards antibiotic administration to pregnant women, during delivery and for children under two     |
| <b>Focus group discussion</b>                   | 1) Pregnant women<br><br>2) Mothers                                                                                                                         | 1) At pre-intervention (women selected from outside the study area)<br><br>2) At pre-intervention (women selected from outside the study area), and at post-intervention (women from the study area)                                                                                                                        | Perceptions of pregnant women and mothers regarding antibiotic use and resistance during pregnancy, delivery and for children under two   |

ANC-antenatal care; HCPs- healthcare providers.

**BMJ Open\_200508\_V[final]**

1  
2  
3  
4  
5  
6  
7  
8  
9  
10  
11  
12  
13  
14  
15  
16  
17  
18  
19  
20  
21  
22  
23  
24  
25  
26  
27  
28  
29  
30  
31  
32  
33  
34  
35  
36  
37  
38  
39  
40  
41  
42  
43  
44  
45  
46  
47  
48  
49  
50  
51  
52  
53  
54  
55  
56  
57  
58  
59  
60

Figure 1 Timeline of the project

KAP-Knowledge, attitude and practice.

For peer review only

## REFERENCES

1. Sengupta S, Chattopadhyay MK, Grossart HP. The multifaceted roles of antibiotics and antibiotic resistance in nature. *Front Microbiol.* 2013;4:47.
2. World Health Organization. Global Action Plan on Antimicrobial Resistance. 2015.
3. O'Neill J. Antimicrobial resistance: tackling a crisis for the health and wealth of nations, The review on antimicrobial resistance. 2014.
4. Heijden Mvd. When the Drugs Don't Work Antibiotic Resistance as a Global Development Problem. 2019.
5. World Health Organization. Antimicrobial resistance: global report on surveillance. 2014.
6. Stålsby Lundborg C, Tamhankar AJ. Understanding and changing human behaviour--antibiotic mainstreaming as an approach to facilitate modification of provider and consumer behaviour. *Ups J Med Sci.* 2014;119(2):125-33.
7. World Health Organization. The evolving threat of antimicrobial resistance: options for action. 2012.
8. Martinez de Tejada B. Antibiotic use and misuse during pregnancy and delivery: benefits and risks. *Int J Environ Res Public Health.* 2014;11(8):7993-8009.
9. Mylonas I. Antibiotic chemotherapy during pregnancy and lactation period: aspects for consideration. *Arch Gynecol Obstet.* 2011;283(1):7-18.
10. Santos F, Oraichi D, Berard A. Prevalence and predictors of anti-infective use during pregnancy. *Pharmacoepidemiol Drug Saf.* 2010;19(4):418-27.
11. de Jonge L, Bos HJ, van Langen IM, de Jong-van den Berg LT, Bakker MK. Antibiotics prescribed before, during and after pregnancy in the Netherlands: a drug utilization study. *Pharmacoepidemiol Drug Saf.* 2014;23(1):60-8.
12. Walker WA. The importance of appropriate initial bacterial colonization of the intestine in newborn, child, and adult health. *Pediatr Res.* 2017.
13. Mackie RI, Sghir A, Gaskins HR. Developmental microbial ecology of the neonatal gastrointestinal tract. *Am J Clin Nutr.* 1999;69(5):1035S-45S.
14. World Health Organization. WHO recommendatin for prevention and treatment of maternal peripartum infections. 2015.
15. Sharma M, Sanneving L, Mahadik K, Santacatterina M, Dhaneria S, Stålsby Lundborg C. Antibiotic prescribing in women during and after delivery in a non-teaching, tertiary care hospital in Ujjain, India: a prospective cross-sectional study. *J Pharm Policy Pract.* 2013;6:9.
16. Tenover FC, McGowan JE, Jr. Reasons for the emergence of antibiotic resistance. *Am J Med Sci.* 1996;311(1):9-16.
17. Stoesser N, Xayaheuang S, Vongsouvath M, Phommasone K, Elliott I, Del Ojo Elias C, et al. Colonization with Enterobacteriaceae producing ESBLs in children attending pre-school childcare facilities in the Lao People's Democratic Republic. *J Antimicrob Chemother.* 2015;70(6):1893-7.
18. Stoesser N, Crook DW, Moore CE, Phetsouvanh R, Chansamouth V, Newton PN, et al. Characteristics of CTX-M ESBL-producing *Escherichia coli* isolates from the Lao People's Democratic Republic, 2004-09. *J Antimicrob Chemother.* 2012;67(1):240-2.
19. Olaitan AO, Thongmalayvong B, Akkhavong K, Somphavong S, Paboriboune P, Khounsy S, et al. Clonal transmission of a colistin-resistant *Escherichia coli* from a domesticated pig to a human in Laos. *J Antimicrob Chemother.* 2015;70(12):3402-4.
20. World Bank. [Available from: <https://data.worldbank.org/country/lao-pdr>].

**BMJ Open\_200508\_V[final]**

21. World Bank. Lao PDR Civil Registration and Vital Statistics Project Lao PDR Civil Registration and Vital Statistics Project [Available from: <http://documents.worldbank.org/curated/en/408371561720719822/pdf/Concept-Project-Information-Document-Integrated-Safeguards-Data-Sheet-Lao-People-s-Democratic-Republic-Civil-Registration-and-Vital-Statistics-Project-P167601.pdf>].
22. Hoan IT, Chuc NT, Ottosson E, Allebeck P. Drug use among children under 5 with respiratory illness and/or diarrhoea in a rural district of Vietnam. *Pharmacoepidemiol Drug Saf.* 2009;18(6):448-53.
23. Chalker J, Ratanawijitrasin S, Chuc NT, Petzold M, Tomson G. Effectiveness of a multi-component intervention on dispensing practices at private pharmacies in Vietnam and Thailand--a randomized controlled trial. *Soc Sci Med.* 2005;60(1):131-41.
24. Hoa NQ, Thi Lan P, Phuc HD, Chuc NTK, Stalsby Lundborg C. Antibiotic prescribing and dispensing for acute respiratory infections in children: effectiveness of a multi-faceted intervention for health-care providers in Vietnam. *Glob Health Action.* 2017;10(1):1327638.
25. Improvement N. Plan, Do, Study, Act (PDSA) cycles and the model for improvement [Available from: <https://improvement.nhs.uk/documents/2142/plan-do-study-act.pdf>].
26. Lester RT, Ritvo P, Mills EJ, Kariri A, Karanja S, Chung MH, et al. Effects of a mobile phone short message service on antiretroviral treatment adherence in Kenya (WelTel Kenya1): a randomised trial. *Lancet.* 2010;376(9755):1838-45.
27. Sabin LL, Bachman DeSilva M, Gill CJ, Zhong L, Vian T, Xie W, et al. Improving Adherence to Antiretroviral Therapy With Triggered Real-time Text Message Reminders: The China Adherence Through Technology Study. *J Acquir Immune Defic Syndr.* 2015;69(5):551-9.
28. Free C, Phillips G, Galli L, Watson L, Felix L, Edwards P, et al. The effectiveness of mobile-health technology-based health behaviour change or disease management interventions for health care consumers: a systematic review. *PLoS Med.* 2013;10(1):e1001362.
29. Coleman J, Bohlin KC, Thorson A, Black V, Mechael P, Mangxaba J, et al. Effectiveness of an SMS-based maternal mHealth intervention to improve clinical outcomes of HIV-positive pregnant women. *AIDS Care.* 2017;29(7):890-7.
30. REDCap (Research Electronic Data Capture) [Available from: <https://projectredcap.org/software/>].
31. Graneheim UH, Lundman B. Qualitative content analysis in nursing research: concepts, procedures and measures to achieve trustworthiness. *Nurse Educ Today.* 2004;24(2):105-12.

**AUTHORS CONTRIBUTION**

All authors conceptualised the project. AM drafted the manuscript. CSL, SK and AS revised the manuscript. All other authors read the manuscript and provided comments.

**FUNDING**

This study is supported by funding from Southeast Asia Europe Joint Funding Scheme on Research and Innovation.

**COMPETING INTERESTS**

**BMJ Open\_200508\_V[final]**

The authors have no competing interest to declare for this study

**OPEN ACCESS**

This is an Open Access article distributed in accordance with the Creative Commons Attribution-Non Commercial 4.0 International (CC BY-NC 4.0) license, which permits others to distribute, remix, adapt, build upon this work non-commercially, and license their derivative works on different terms, provided the original work is properly cited and the use is non-commercial. See: <http://creativecommons.org/licenses/by-nc/4.0/>.

**PATIENT AND PUBLIC INVOLVEMENT**

Patients and the public were not involved in the design of this study.

1  
 2  
 3  
 4  
 5  
 6  
 7  
 8  
 9  
 10  
 11  
 12  
 13  
 14  
 15  
 16  
 17  
 18  
 19  
 20  
 21  
 22  
 23  
 24  
 25  
 26  
 27  
 28  
 29  
 30  
 31  
 32  
 33  
 34  
 35  
 36  
 37  
 38  
 39  
 40  
 41  
 42  
 43  
 44  
 45  
 46  
 47  
 48  
 49  
 50  
 51  
 52  
 53  
 54  
 55  
 56  
 57  
 58  
 59  
 60

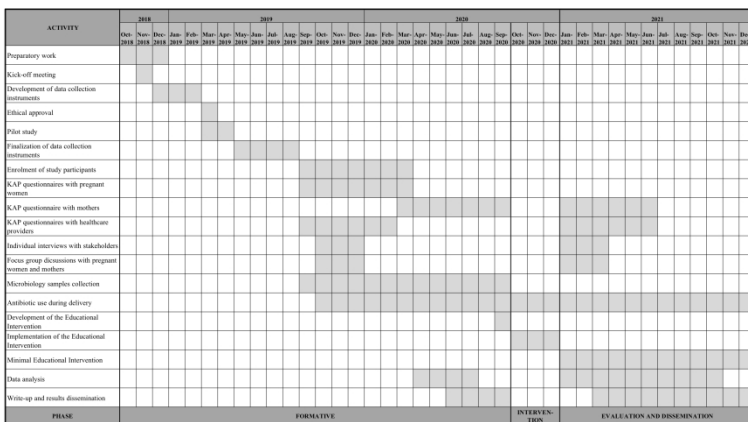

Title: Figure 1 Timeline of the project  
 Legend: KAP-Knowledge, attitude and practice.

338x190mm (300 x 300 DPI)

# BMJ Open

## Containment of Antibiotic RESistance - measures to improve antibiotic use in pregnancy, childbirth and young children (CAREChild): a protocol of a prospective, quasi-experimental interventional study in Lao PDR.

|                                 |                                                                                                                                                                                                                                                                                                                                                                                                                                                                                                                                                                                                                                                                                                                                                                                                                                                                                                                                                                                                                                                                                                                                                                                                                                                 |
|---------------------------------|-------------------------------------------------------------------------------------------------------------------------------------------------------------------------------------------------------------------------------------------------------------------------------------------------------------------------------------------------------------------------------------------------------------------------------------------------------------------------------------------------------------------------------------------------------------------------------------------------------------------------------------------------------------------------------------------------------------------------------------------------------------------------------------------------------------------------------------------------------------------------------------------------------------------------------------------------------------------------------------------------------------------------------------------------------------------------------------------------------------------------------------------------------------------------------------------------------------------------------------------------|
| Journal:                        | <i>BMJ Open</i>                                                                                                                                                                                                                                                                                                                                                                                                                                                                                                                                                                                                                                                                                                                                                                                                                                                                                                                                                                                                                                                                                                                                                                                                                                 |
| Manuscript ID                   | bmjopen-2020-040334.R1                                                                                                                                                                                                                                                                                                                                                                                                                                                                                                                                                                                                                                                                                                                                                                                                                                                                                                                                                                                                                                                                                                                                                                                                                          |
| Article Type:                   | Protocol                                                                                                                                                                                                                                                                                                                                                                                                                                                                                                                                                                                                                                                                                                                                                                                                                                                                                                                                                                                                                                                                                                                                                                                                                                        |
| Date Submitted by the Author:   | 06-Oct-2020                                                                                                                                                                                                                                                                                                                                                                                                                                                                                                                                                                                                                                                                                                                                                                                                                                                                                                                                                                                                                                                                                                                                                                                                                                     |
| Complete List of Authors:       | <p>Machowska, Anna; Karolinska Institute, Department of Global Public Health<br/> Sihavong, Amphoy ; Lao Ministry of Health, Vientiane Capital Health Department<br/> Eriksen, Jaran; Karolinska Institutet, Department of Global Public Health; Stockholm South General Hospital, Department of Infectious diseases/Venhälsan<br/> Vongsouvath, Manivanh; Mahosot Hospital, Lao-Oxford-Mahosot Hospital-Wellcome Trust Research Unit (LOMWRU), Microbiology Laboratory<br/> Marrone, Gaetano; Karolinska Institute, Department of Global Public Health<br/> Sychareun, Vanphanom; Lao University of Health Sciences, Faculty of Postgraduate Studies<br/> Hanson, Claudia; Karolinska Institute, Department of Global Public Health<br/> Keohavong, Bounxou; Lao Ministry of Health, Food and Drug Department<br/> Brauner, Annelie ; Karolinska Institute, Department of Microbiology, Tumor and Cell Biology<br/> Mayxay, Mayfong; Mahosot Hospital, Lao-Oxford-Mahosot Hospital-Wellcome Trust Research Unit (LOMWRU), Microbiology Laboratory; Lao University of Health Sciences<br/> Kounnavong, Sengchanh; Lao Tropical and Public Health Institute<br/> Lundborg, Cecilia; Karolinska Institute, Department of Global Public Health</p> |
| <b>Primary Subject Heading</b>: | Global health                                                                                                                                                                                                                                                                                                                                                                                                                                                                                                                                                                                                                                                                                                                                                                                                                                                                                                                                                                                                                                                                                                                                                                                                                                   |
| Secondary Subject Heading:      | Obstetrics and gynaecology, Paediatrics                                                                                                                                                                                                                                                                                                                                                                                                                                                                                                                                                                                                                                                                                                                                                                                                                                                                                                                                                                                                                                                                                                                                                                                                         |
| Keywords:                       | PUBLIC HEALTH, OBSTETRICS, GYNAECOLOGY, MICROBIOLOGY                                                                                                                                                                                                                                                                                                                                                                                                                                                                                                                                                                                                                                                                                                                                                                                                                                                                                                                                                                                                                                                                                                                                                                                            |
|                                 |                                                                                                                                                                                                                                                                                                                                                                                                                                                                                                                                                                                                                                                                                                                                                                                                                                                                                                                                                                                                                                                                                                                                                                                                                                                 |



1  
2  
3  
4  
5  
6  
7  
8  
9  
10  
11  
12  
13  
14  
15  
16  
17  
18  
19  
20  
21  
22  
23  
24  
25  
26  
27  
28  
29  
30  
31  
32  
33  
34  
35  
36  
37  
38  
39  
40  
41  
42  
43  
44  
45  
46  
47  
48  
49  
50  
51  
52  
53  
54  
55  
56  
57  
58  
59  
60

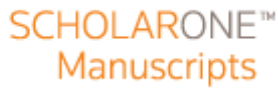



I, the Submitting Author has the right to grant and does grant on behalf of all authors of the Work (as defined in the below author licence), an exclusive licence and/or a non-exclusive licence for contributions from authors who are: i) UK Crown employees; ii) where BMJ has agreed a CC-BY licence shall apply, and/or iii) in accordance with the terms applicable for US Federal Government officers or employees acting as part of their official duties; on a worldwide, perpetual, irrevocable, royalty-free basis to BMJ Publishing Group Ltd ("BMJ") its licensees and where the relevant Journal is co-owned by BMJ to the co-owners of the Journal, to publish the Work in this journal and any other BMJ products and to exploit all rights, as set out in our [licence](#).

The Submitting Author accepts and understands that any supply made under these terms is made by BMJ to the Submitting Author unless you are acting as an employee on behalf of your employer or a postgraduate student of an affiliated institution which is paying any applicable article publishing charge ("APC") for Open Access articles. Where the Submitting Author wishes to make the Work available on an Open Access basis (and intends to pay the relevant APC), the terms of reuse of such Open Access shall be governed by a Creative Commons licence – details of these licences and which [Creative Commons](#) licence will apply to this Work are set out in our licence referred to above.

Other than as permitted in any relevant BMJ Author's Self Archiving Policies, I confirm this Work has not been accepted for publication elsewhere, is not being considered for publication elsewhere and does not duplicate material already published. I confirm all authors consent to publication of this Work and authorise the granting of this licence.

**BMJ Open\_200508\_V[final]\_revision 6 October****Containment of Antibiotic REsistance - measures to improve antibiotic use in pregnancy, childbirth and young children (CAREChild): a protocol of a prospective, quasi-experimental interventional study in Lao PDR.**

Anna Machowska<sup>1</sup>, Amphoy Sihavong<sup>2</sup>, Jaran Eriksen<sup>1,10</sup>, Manivanh Vongsouvath<sup>3</sup>, Gaetano Marrone<sup>1</sup>, Vanphanom Sychareun<sup>4</sup>, Claudia Hanson<sup>1</sup>, Bounxou Keohavong<sup>5</sup>, Annelie Brauner<sup>6</sup>, Mayfong Mayxay<sup>3,7,8</sup>, Sengchanh Kounnavong<sup>9</sup>, Cecilia Stålsby Lundborg<sup>1</sup>

<sup>1</sup>Department of Global Public Health, Health Systems and Policy, Karolinska Institutet, Tomtebodavägen 18A, 17 177 Stockholm, Sweden

<sup>2</sup>Vientiane Capital Health Department, Ministry of Health, Lao PDR

<sup>3</sup>Lao-Oxford-Mahosot Hospital-Wellcome Trust Research Unit (LOMWRU), Microbiology Laboratory, Mahosot Hospital, Vientiane, Lao PDR

<sup>4</sup>University of Health Sciences, Ministry of Health, Lao PDR

<sup>5</sup>Food and Drug Department, Ministry of Health, Vientiane, Lao PDR

<sup>6</sup>Department of Microbiology, Tumor and Cell Biology, Division of Clinical Microbiology, Karolinska Institutet and Karolinska University Hospital, 17 176 Stockholm, Sweden

<sup>7</sup>Institute of Research and Education Development (IRED), University of Health Sciences, Ministry of Health, Vientiane, Lao PDR

<sup>8</sup>Centre for Tropical Medicine and Global Health, Nuffield Department of Medicine, University of Oxford, Oxford, United Kingdom

<sup>9</sup>Lao Tropical and Public Health Institute, Ministry of Health, Vientiane, Lao PDR

<sup>10</sup>Department of Infectious diseases/Venhälsan, Stockholm South Hospital, 118 83 Stockholm, Sweden

Corresponding author:

Anna Machowska

Email: [anna.machowska@ki.se](mailto:anna.machowska@ki.se)

Phone: +46 (0) 8 524 833 84

**BMJ Open\_200508\_V[final]\_revision 6 October**

Department of Global Public Health, Health Systems and Policy, Karolinska Institutet, Tomtebodavägen  
18A, 17 177 Stockholm, Sweden

Key words: antibiotics; antibiotic resistance; educational intervention; knowledge, attitudes, practice;  
maternal and child health.

For peer review only

**BMJ Open\_200508\_V[final]\_revision 6 October****ABSTRACT**

**Introduction:** Antibiotics are essential to treat infections during pregnancy and to reduce both maternal and infant mortality. Overall use, but especially non-indicated use and misuse of antibiotics are drivers of antibiotic resistance (ABR). High non-indicated use of antibiotics for uncomplicated vaginal deliveries is widespread in many parts of the world. Similarly, irrational use of antibiotics is reported for children. There is scarcity of evidence regarding antibiotic use and ABR in Lao PDR (Laos). The overarching aim of this project is to fill those knowledge gaps and to evaluate a quality improvement intervention. The primary objective is to estimate the proportion of uncomplicated vaginal deliveries where antibiotics are used and to compare its trend before and after the intervention.

**Methods and analysis:** This 3-year, prospective, quasi-experimental study without comparison group includes a formative and interventional phase. Data on antibiotic use during delivery will be collected from medical records. Knowledge, attitudes and reported practices on antibiotic use in pregnancy, during delivery and for children will be collected from women through questionnaires. HCPs' knowledge, attitudes and practices of antibiotics administration for pregnant women, during delivery and for children will be collected via adapted questionnaires. Perceptions regarding antibiotics will be explored through focus group discussions with women and individual interviews with key stakeholders. Faecal samples for culturing of *Escherichia coli* and *Klebsiella spp.* and antibiotic susceptibility testing will be taken before, during and six months after delivery to determine colonisation of resistant strains. The planned intervention will comprise training workshops, educational materials and social media campaign and will be evaluated using interrupted time series analysis.

**Ethics and Dissemination:** The project received ethical approval from the National Ethics Committee for Health Research, Ministry of Health, Laos. The results will be disseminated via scientific publications, conference presentations and communication with stakeholders.

**Trail registration number:** ISRCTN16217522

**BMJ Open\_200508\_V[final]\_revision 6 October****ARTICLE SUMMARY**

- This is the first study that addresses perceptions, knowledge, attitudes and practices regarding antibiotic use and antibiotic resistance among pregnant women and mothers of children under two and healthcare providers in Lao PDR, using interviews and records reviews.
- This study is also the first to collect data on antibiotic resistance carriage patterns of *Escherichia coli* and *Klebsiella spp.* among healthy pregnant women and their children in these settings.
- We will generate evidence on knowledge of healthcare providers and community, and possibly decrease unnecessary use of antibiotics (especially for uncomplicated vaginal delivery), therefore contribute to containing the spread of antibiotic resistance.
- The broad range of stakeholders such as researchers, healthcare providers, local authorities, policy makers involved in the study may contribute to the effective implementation of the intervention and development of national and local prescribing guidelines.
- The study participants, both pregnant women and healthcare providers may tend to answer the questions about their practices in a way they think it is expected, therefore social desirability bias cannot be overruled.

**BMJ Open\_200508\_V[final]\_revision 6 October**

## INTRODUCTION

Antibiotics are life- saving medicines and important interventions in health systems (1). Misuse and overuse of antibiotics contribute to development and spread of antibiotic resistance (ABR)- one of the most pressing global health threats (2, 3). ABR contributes to increased morbidity, mortality and healthcare costs, and disproportionately impacts poorer countries where access to, and use of, antibiotics is frequently coupled with a high prevalence of infectious disease, exacerbating global economic inequalities (4). ABR is a complex process driven by many interrelated factors (5-7). To effectively mitigate the emergence and dissemination of ABR, pragmatic and collaborative actions are required including behavioural change interventions and infections prevention and control measures.

Antibiotics are essential to treat common infections during pregnancy, to prevent maternal and neonatal infections during delivery, and to treat infections arising from surgical wounds after caesarean sections (8, 9). Reports from Canada and The Netherlands showed that approximately 20–25% of women received antibiotics during pregnancy (10, 11). However, during pregnancy the use of any medicines, and specifically antibiotics is a risk-versus-benefit decision and needs to be carefully considered.

The use of antibiotics during the pregnancy delays final infant's gut colonisation and during that time the infants are more susceptible to infections and to immune-mediated diseases (12, 13). This might result in increased antibiotic consumption in childhood and ultimately leads to increased ABR.

Use of antibiotics for uncomplicated vaginal delivery is generally not recommended (14), however some reports show alarmingly high use in these situations. For instance, data from India showed that 87% of women who had vaginal delivery received antibiotics and 28% were discharged from the hospital with prescribed antibiotics regardless the mode of the delivery (15).

Therefore, the use of antibiotics by the vulnerable groups e.g. children and pregnant women, has to be carefully monitored and evaluated bearing in mind side effects such as nausea, diarrhoea, or quinolone toxicity to the developing skeletal system.

The faecal microbiota serves as a reservoir for antibiotic resistance genes. Exposure of commensals such as *Escherichia coli* (*E.coli*) to antibiotics may increase the carriage levels of resistance genes and facilitate their spread to pathogenic strains of bacteria (16). So far, a few studies have looked at ABR in bacteria isolated from humans in Lao PDR (Laos), mainly in the capital city-Vientiane or province. One study from 2011 showed colonisation of *Enterobacteriaceae* producing Extended Spectrum Beta-Lactamase (ESBLs) among 23% of healthy pre-school children (17). Another study from one of the major hospitals in Vientiane show increasing occurrence of ESBLs in bloodstream *E. coli* isolates (18). In contrast, case reports of colistin resistance (the last antibiotic option for multidrug resistant Gram-negative bacteria) showed a potentially severe situation relating to ABR in the country, however a structured study to support these results is needed (19).

While there is some evidence of irrational antibiotic use, studies on antibiotic use among children in Laos have, to our knowledge, not been conducted. Also, data regarding antibiotic use during pregnancy and childbirth in Laos are scarce. Data from 2008 (*Sihavong A, et al, unpublished*), showed that from

**BMJ Open\_200508\_V[final]\_revision 6 October**

300 women with normal vaginal deliveries, 79% delivered at home, of those 25% used antibiotics and among women who delivered in hospitals 79% received antibiotics. Since then the quality of antenatal care (ANC) has improved, is free of charge and attendance to ANC has increased. Data from Lao Social Indicators survey from 2017 shows that 65% of women delivered at health facilities and more than 80% attended ANC at least once.

In this study protocol we present the scheme of data collection, plan for data analysis and implementation and evaluation of the intervention targeted to healthcare providers (HCPs) and community.

The project Containment of Antibiotic REsistance - measures to improve antibiotic use in pregnancy, childbirth and young children (CAREChild) is an international project between partner institutions in Laos and Sweden that aims to understand and improve antibiotic use in relation to pregnancy, childbirth and early childhood in Laos with the long-term aim to contain ABR.

The specific objectives are to:

- Estimate the proportion of uncomplicated vaginal deliveries where antibiotics are used and to compare its trend before and after the intervention.
- Explore and assess perceptions, knowledge, attitudes, and reported practice of pregnant women, and mothers of children under two regarding antibiotic use and resistance in relation to pregnancy, childbirth, and children under two years of age.
- Explore and assess perceptions, knowledge, attitudes, reported practice, as well as actual practice of HCPs regarding antibiotic use and resistance in relation to pregnancy, childbirth, and children under two years of age.
- Estimate the ABR situation with focus on ESBLs producing and multi drug resistant *E. coli* and *Klebsiella spp.* carriage in faecal samples among women and children.
- Develop and test interventions aimed at HCPs and community members to improve use of antibiotics.

We hypothesise that use of antibiotics for uncomplicated vaginal deliveries is high and that the educational intervention will reduce the proportion of antibiotics administered and lead to an improvement in knowledge regarding antibiotic use and ABR of both community and HCPs.

**METHODS AND ANALYSIS: STUDY DESIGN AND DATA COLLECTION***Study design*

This is a 3-year, prospective, quasi-experimental, interventional study with both continuous and repeated data collection. The study will start with an extensive formative phase leading to the development of an intervention, which will be evaluated through time series analysis. In the formative phase potential barriers and facilitators for implementing the intervention will be identified. Collected data will inform about the context, adaptations, and response to change of HCPs and the community



**BMJ Open\_200508\_V[final]\_revision 6 October**

behaviours in relation to antibiotic use. Quantitative and qualitative data will be collected before (formative phase) and after the intervention at all health facilities and in the community.

*Study settings*

The study will be conducted in Laos, a lower middle-income country in Southeast Asian with approximately 7 million inhabitants and relatively low population density (20). Laos has 17 provinces, one capital city, 148 districts and 8459 villages. Around two third of the population lives in rural areas and relies on agricultural work, specifically rice farming. Individual villages in Laos tend to be home to a particular ethnic group (21). Feuang and Vangvieng districts in Vientiane Province in the central part of the country will be selected as study areas based on variations in background characteristics, representing different ethnic minority population and for feasibility reasons. In order to better understand the current situation of antibiotic use and ABR, all levels of healthcare facilities i.e. Vientiane provincial hospital, two district hospitals and six health centres in each of the two study districts will be purposively selected as the study sites. To avoid contamination, the qualitative part of the study before the intervention will be conducted in Thulakhom district (Vientiane province) which is outside the study area. For the same reason the pilot study will take place in Phonehong (Vientiane province) and Santhong districts (Vientiane Capital). List of the study sites can be obtained on request from the local principal investigator.

*Inclusion criteria for women*

1. All pregnant women in the 3<sup>rd</sup> trimester, who after the enrolment plan to stay in the area for the next 24 months, who are willing to participate in the study, and whose infants are born during the study period.

*Inclusion criteria for HCPs*

1. All medical doctors, assistant doctors, midwives, nurses, pharmacists, assistant pharmacists at the Vientiane provincial hospital, district hospitals or health centres in Feuang or Vangvieng as well as drug sellers (only pharmacists and assistant pharmacists) at private pharmacies in these districts.
2. For individual qualitative interviews: private providers (in private clinics and pharmacies) in the study area, representatives from central level such as Ministry of Health, university and professional organizations in addition to providers from the public healthcare facilities, HCPs and policy makers from the Maternal and New-born Hospital (MNH) in Vientiane capital, where women from different parts of the country come for ANC and consultation.

**BMJ Open\_200508\_V[final]\_revision 6 October***Data collection: pilot study*

Building on the research team's experiences (15, 22) and expertise of the local team, the data collection instruments were developed in English, adapted for different target groups and translated to Lao. In March 2019 a pilot study was conducted to field test the data collection instruments and procedures to train data collectors. In total, 30 questionnaires on knowledge, attitudes and reported practices were pilot tested with 10 HCPs, 10 pregnant women and 10 mothers of a child under two. In parallel, to capture perceptions, focus group discussion (FGD) and qualitative interview guides were tested during 1 FGD with mothers and 1 FGD with pregnant women and 4 interviews with HCPs. Preliminary results from the pilot test have guided the final version of data collection instruments and shed light on possible components and acceptability of the intervention. A summary of the data collection instruments that will be used in the study is presented in Table 1.

*Quantitative data collection*

Repeated structured interviews on knowledge, attitude and reported practice regarding antibiotic use, ABR and antibiotic side effects will be performed with women at 3 time points i.e. before the intervention (during pregnancy and 6 months after delivery) and after the intervention.

HCPs will be interviewed about their knowledge, attitudes and reported practice regarding antibiotic use for pregnant women, delivery and for children before and after the intervention. Simultaneously, data on antibiotic use during delivery will be continuously collected from patient records in all included health facilities.

The baseline interviews with expecting mothers and HCPs will be performed at ANC visit. The follow up questionnaires with the women after delivery will be performed during the routine vaccination scheme visit or if not possible in the household. HCPs are interviewed at their workplace.

To capture additional information on self-reported use of antibiotics, several forms will be attached to the ANC booklet- a booklet that women receive at the beginning of pregnancy and where all pregnancy related information are recorded by HCP (Table 1). Pregnant women will be asked to report all medicines taken regularly to improve overall health status, prevent disease or treat chronic condition (e.g. folic acid, iron, herbs) or occasionally for any episode of illness (e.g. antibiotic, paracetamol, herbs). Similarly, a regular and occasional use will be reported by mothers for their children. Additionally, we will collect data on the last clinical examination of pregnant woman and/or a child. The forms will be filled by a HCP at each occasion when a pregnant woman and/or child seeks for health care with symptoms of illness. The forms will be collected monthly from the ANC booklet by a designated person at each health care facility, stored in a secure place and then collected by the study team.

*Qualitative data collection*

**BMJ Open\_200508\_V[final]\_revision 6 October**

FGDs will be organised to discuss women's perceptions of antibiotic use, ABR and side effects during pregnancy, childbirth and for children. A range of stakeholders (HCPs and policy makers) will be individually interviewed to explore their views on antibiotic use, ABR, side effects of antibiotic use during pregnancy, childbirth and for children as well as infection prevention and control measures.

Before the intervention 6 FGDs (3 groups with 29 pregnant women and 3 groups with 26 mothers with children under two years of age) will be organised in Thulakhom district, and approximately 30 HCPs will participate in the individual qualitative interviews (approximately 9 at central and provincial level, and 12 at district level). After the intervention the FGDs and individual interviews will be conducted with similar number of participants until data saturation is reached. The FGDs and individual interview guides themes are presented in Appendix 1.

*Recruitment*

The pregnant women will be identified via the local health registry of ANC, and invited to participate during their ANC visit. All HCPs working in the study sites will be invited to participate and will be notified about the study via local health staff name list. Women who will participate in FGDs before the intervention will be identified during postpartum visit and/or child vaccination visit and approached by local health staff. Stakeholders for individual qualitative interviews will be identified and recruited via local health staff name list.

*Data collection performance*

The data collection team comprises: 4 Master's students from Lao Tropical and Public Health Institute, 4 staff members from the same Institute and 4 staff members from the University of Health Science in Vientiane who speak the local language. All data collectors will participate in a 1-week long training shortly before the initiation of data collection. The training will consist of lectures on qualitative and quantitative methodology, practical sections on using electronic platform for data collection with tablets, practical session on qualitative interviews, standard operating procedures for each question, microbiology samples collection and field management. Data collectors will conduct both quantitative and qualitative interviews and act as moderators and note takers during FGDs.

**METHODS AND ANALYSIS: INTERVENTION***Educational intervention*

The results from the pilot study and formative phase, combined with the experience in educational interventions of the research team (23, 24) will feed in the development of a contextual educational intervention. The educational package aims to decrease unnecessary antibiotic use for uncomplicated vaginal deliveries and during pregnancy, increased knowledge and indirectly limit the spread of ABR. The educational intervention will be conducted in Feuang district due to feasibility reason and faster availability of baseline data, will start immediately after follow up data collection and will last 3 months.

**BMJ Open\_200508\_V[final]\_revision 6 October**

1  
2  
3 After completion of the intervention the research team aims to sustain some of the intervention activities  
4 e.g. posters display. The project timeline is presented in Figure 1.

5  
6 The intervention will consist of several components tailored to HCPs and community:

7  
8 1) A participatory, iterative process-based model for improvement will be used as a conceptual  
9 framework for developing, testing and implementing changes in the proposed intervention. The Plan-  
10 Do-Study-Act cycle allows to test out changes on a small scale, building on the learning from these  
11 cycles in a structured way before the full-scale implementation (25).

12  
13 Results from the formative phase (started in September 2019) showed that almost all HCPs have access  
14 to a mobile phone and would accept an intervention provided via online platforms or social media.  
15 Although there are several treatment guidelines in place at the national level, there are no specific  
16 guidelines regarding intrapartum antibiotic use. Therefore, several interventional components will be  
17 targeted to HCPs.

18  
19 a) Educational workshops with a key content on selection of antibiotics per indication, use of broad vs  
20 narrow spectrum antibiotics and feedback on qualitative and quantitative findings. Workshops will be  
21 delivered by a facilitator using power point, case studies, presentation of support tools (e.g. alcohol-  
22 based hand rub) and role playing. These workshops will take place at several occasions during 3 months  
23 intervention period and the facilitator will use Train the Trainers approach.

24  
25 b) Educational tools (leaflets, handouts) regarding antibiotic use during pregnancy, childbirth and for  
26 children, ABR, infection prevention and control will be developed and provided by the study team to  
27 each HCPs via both traditional (at health care facilities) and online channels.

28  
29 c) Short, acceptable messages will be developed and sent regularly from a trusted source (i.e. Lao  
30 Tropical and Public Health Institute) via WhatsApp to all HCPs who participated in the workshops.

31  
32 In addition, a revision of existing curricula for HCPs educational tracks and if needed initiation of  
33 recurrent training regarding intrapartum antibiotic use will take place. A collaboration with national  
34 Obstetrics and Gynaecology Association will be initiated to work on the development of local  
35 prescribing guidelines.

36  
37  
38 2) Women are usually the main caregivers of the children and often the main decision-makers regarding  
39 health care seeking behaviour, and have a great impact on the use of antibiotics among pregnant women  
40 and children. Simple and inexpensive interventions using short text messages have been widely used in  
41 low- and middle- income countries and some of them showed to be a potent tool for behavioural change  
42 (26-29). The results from the formative phase showed that initially planned mHealth intervention will  
43 not be feasible to target community members. Mobile phone ownership is as low as 30% among the  
44 rural population and the male, head of household, often is in charge of the phone. Therefore, the  
45 following intervention components will be used:

46  
47 a) Educational workshops that will cover broad range of topics e.g. antibiotic use during pregnancy,  
48 hygiene and self- care during pregnancy and delivery (in case of home deliveries) and after delivery,  
49  
50  
51  
52  
53  
54  
55  
56  
57  
58  
59  
60

**BMJ Open\_200508\_V[final]\_revision 6 October**

breastfeeding and other feeding practices, vaccinations, caring for a sick child, antibiotic use for children. The workshops will be organised in the villages at several occasion during the intervention period, delivered by a facilitator and supported by local health staff. We also aim to ask local Lao Women's Union to support and endorse the activities.

b) Several well accepted communication channels such as posters and radio campaigns to convey the key message on prudent antibiotic use during pregnancy and for children will be used. Posters will be displayed in villages e.g. around intersections or by residents' gathering places, such as the door of the supermarket or village clinic or pharmacy, or outer wall of a house located on the main road. Radio campaigns will be designed and delivered as a short role-playing scenarios e.g. newly delivered women and HCPs talking about need for antibiotics after delivery in decided broadcasting time.

*Evaluation of the intervention**Primary outcome*

The primary outcome of the study is the proportion of uncomplicated normal deliveries for which antibiotics were used. Data on antibiotic use for each delivery will be collected from patient records at included health facilities continuously for 12 months before, during and 12 months after the intervention. The impact of the intervention will be evaluated through time series analysis.

*Secondary outcomes*

- Knowledge, attitudes and reported practices regarding antibiotic use during pregnancy and for children and ABR of pregnant women and mothers.
- Knowledge, attitudes and reported practices regarding antibiotic use for pregnant women, during delivery and for children and ABR of HCPs
- Proportion of samples with ESBL or multi drug resistant producing bacteria and other relevant resistances pattern to tested antibiotics (only pre-intervention phase).
- Proportion of children under 2 years of age where antibiotics have been used.
- Proportion of caesarean section deliveries where antibiotics are given.

Following the completion of the intervention phase, mothers and HCPs will be interviewed again using the same questionnaires as at the pre-intervention to evaluate the change in their knowledge, attitudes and practices. To evaluate if the intervention was carried out as planned and detect the strengths and weaknesses of the programme, several process indicators data will be collected. We will monitor number of participants, number of booklets, handouts and posters printed and distributed. A local research team will use a process evaluation form to monitor the intervention with local partners. After the workshops both HCPs and community members will be given a questionnaire to collect their reflections on the provided content.

**METHODS AND ANALYSIS: MICROBIOLOGY ANALYSIS AND METHODS**

**BMJ Open\_200508\_V[final]\_revision 6 October***Microbiology samples collection and analysis*

We aim to estimate the prevalence of faecal carriage of ESBL producing and multi drug resistant *E. coli* and *Klebsiella spp.* Rectal swabs will be collected from all pregnant women before delivery, during delivery from women and their newborn children (meconium) and 6 months after delivery from mothers and their children. Should taking samples during delivery not be possible, they will be taken at home within 7 days after delivery. Rectal swabs will be collected at each health facility in Feuang district by either HCP or mother herself and transported to the district hospital in a cold box with icepack to keep temperature around 2-4°C. After collecting samples in the district hospital, they will be transported to the microbiology laboratory of the Mahosot hospital in Vientiane capital, maintaining the cold chain as appropriate. After arrival, samples will be stored at 4°C until processing. All samples will be processed within 14 days after sampling.

Rectal swabs will be used for culturing on Brilliance UTI Agar (bioMerieux), where *E. coli* will appear as red or pink colonies and *Klebsiella spp.* as dark blue colonies. Species identification will be performed biochemically. Those confirmed as *E. coli* or *Klebsiella spp.* will be screened for ESBL using cefpodoxime. The suspected ESBL strains will be further tested using ceftazidime with and without clavulanic acid and cefotaxime with and without clavulanic acid. In the next step all positive ESBL producing strains will be tested against common antibiotics using disk diffusion susceptibility test: ampicillin, amoxicillin/clavulanic acid, ceftriaxone, meropenem, gentamicin, amikacin, trimethoprim/sulfamethoxazole, cefpodoxime, chloramphenicol, ciprofloxacin, tetracycline. Antibiotic susceptibility testing will be performed by standardised disk diffusion method (CLSI, 2018). In parallel, swabs will be cultured on CHROMID® CARBA (bioMerieux) for detection of carbapenemase-producing *Enterobacteriaceae*. ESBL-producing/CARBA medium isolates of *E. coli* and *Klebsiella spp.* will be stored at -80°C for future analysis.

**METHODS AND ANALYSIS: DATA MANAGEMENT AND ANALYSIS***Electronic data collection, data management and data quality control*

All quantitative data will be collected and managed electronically using Research Electronic Data Capture (REDCap) (30) tool hosted at Karolinska Institutet. REDCap is a secure, web-based application designed to support data capture for research studies, providing audit trails for tracking data manipulation and export procedures. Data collection instruments will be developed in REDCap and, where appropriate, consisted pre-determined checks and range validations. For in-the-field data collection purpose, instruments will be exported onto Samsung tablets (Samsung Galaxy Tab. 3 V, Seoul, South Korea) equipped with mobile internet access. Data collected via tablets will be cross-checked before synchronisation with the REDCap server. Data collected via paper forms will be cross-checked for completeness and entered directly to REDCap server by a data key entry person. Data quality checks will be run weekly by data manager who tracks information such as form completion,

**BMJ Open\_200508\_V[final]\_revision 6 October**

internal consistency, data range and eligibility criteria. Feedback will be regularly communicated with data collectors and study team to assure consistent, high quality data collection.

Qualitative data will be audio-recorded, transcribed verbatim and checked with recorder version.

*Sample size*

Considering an estimated 79% for the main outcome measure of the study (proportion of uncomplicated deliveries in the hospital where antibiotics are given) (*Sihavong A et al., 2008 unpublished*), with a 95% confidence interval, a sample size of 450 deliveries would allow us to have a confidence interval with a width equal to 4%. Therefore, to allow a loss to follow up of 25%, 600 women is included.

*Data analysis*

Statistical analysis will be performed using STATA version 15.1 (College Station, Texas, USA). Descriptive analyses will include frequencies for categorical variables, mean and standard deviation or median and inter- quartile range for continuous variables. Chi-square test will be used to compare two categorical variables, t-test or Mann–Whitney U test will be used to compare a numerical variable in two groups, while when comparing a numerical variable among three or more groups ANOVA or Kruskal–Wallis test will be used. Interrupted time series analysis will be used to compare the trend in the proportion of the primary outcome of interest the 12 months before the planned intervention and 12 months after it (31). Moreover, in order to compare knowledge and attitudes of mothers and HCPs (pre-post intervention) we will use multilevel mixed-effects generalized linear models (Stata command *meglm*) with different family distributions according to the outcome distribution (Stata option *family*). Results will be presented as effect estimates with 95% confidence intervals and will primarily be done both together and separately for each health care facility. Interaction test will be performed if relevant. P-values less than 0.05 will be considered significant in the final analysis.

Manifest and latent qualitative content analysis will be applied for the qualitative data analysis (32).

*Study status*

Data collection started in September 2019, is ongoing and will continue until the end of 2021 followed by data analysis and dissemination of results. Preliminary results obtained from the formative phase supported development of the intervention components and are described in the methods section.

Due to COVID-19 pandemic CHROMID® CARBA (bioMerieux) cannot be continuously delivered to Laos and that results in adjustments in the microbiological procedures. After arrival to the microbiology laboratory of the Mahosot hospital in Vientiane capital, samples are stored at -80°C until processing.

**ETHICS AND DISSEMINATION****Ethics**

**BMJ Open\_200508\_V[final]\_revision 6 October**

1  
2  
3 The project received ethical approval from the National Ethics Committee for Health Research, Ministry  
4 of Health of Laos (031/NECHR dated 27 March 2019). All study participants will receive information  
5 about the aim of the study and their role as participants and they will be asked for a written consent.  
6 They will be informed that participation is voluntary and that they are free to withdraw from the study  
7 at any time without experiencing any repercussions.

8  
9  
10  
11 The research team will take several measures to assure participants' confidentiality throughout the study.  
12 During structured interviews no information that may compromise participant's identity will be  
13 collected. A unique participant's ID code will be generated for each participant and will be used for data  
14 collection and analysis. The unique identifier will be stored separately and accessible only to a data  
15 manager. Moreover, all participants of the FGDs and qualitative interviews will be asked to refrain from  
16 sharing information about what was said during the FGDs and interviews. Although we are aware that  
17 this cannot be guaranteed from all participants, it will be guaranteed from the research team side. The  
18 participants will be informed that the qualitative interviews and FGDs are recorder. All data will be  
19 stored in cloud-based repositories. Data safety, sharing and protection will be agreed on during  
20 consultative meetings in line with national legislation.

21  
22 Risk and benefits for the study participants have been carefully considered. During the data collection  
23 process, we will interview pregnant women and mothers of young children about their knowledge,  
24 attitudes and practices regarding antibiotic use and ABR. There is a risk that some questions may be  
25 perceived as intimidating and cause stress, since women may be afraid that investigators are questioning  
26 their knowledge and practices. For HCPs, participation in the study may cause additional workload  
27 related to answering interview questions and filling up additional forms.

28  
29 However, we believe that the short and long- term outcomes of the study overcome the possible risks  
30 attributable to this study. All researchers involved in the study will work together to minimise potential  
31 risks and stress factors for the study participants at the same time assuring them of the benefits.  
32  
33  
34  
35

**Dissemination Plan**

36  
37 Findings from this project will be disseminated to a range of stakeholders in addition to traditional peer-  
38 reviewed international or national journal articles, conference presentations (Lao National Health  
39 Research Forum), consortium meetings, symposia and networking events. As part of the project  
40 implementation process, we will feedback results to local stakeholders, authorities, policy makers and  
41 community members via various recognised communication channels. The local consortium partners  
42 will be responsible to assure the successful communication with relevant stakeholders. In addition, if  
43 feasible and appropriate dissemination through mass media will be done.  
44  
45  
46  
47  
48  
49  
50  
51  
52  
53  
54  
55  
56  
57  
58  
59  
60



## BMJ Open\_200508\_V[final]\_revision 6 October

Table 1 Data collection tools used in the CAREChild project

| DATA COLLECTION TOOL                            | TARGET DATA SOURCE/PARTICIPANT                                                                                                                                         | TIME POINT AND PLACE OF DATA COLLECTION                                                                                                                                                                                                                                                                                     | OUTCOME VARIABLE                                                                                                                          |
|-------------------------------------------------|------------------------------------------------------------------------------------------------------------------------------------------------------------------------|-----------------------------------------------------------------------------------------------------------------------------------------------------------------------------------------------------------------------------------------------------------------------------------------------------------------------------|-------------------------------------------------------------------------------------------------------------------------------------------|
| <b>Structured interview</b>                     | 1) Pregnant women<br><br>2) Mothers<br><br>3) HCPs                                                                                                                     | 1) At pre-intervention phase, collected during ANC visit<br><br>2) At pre-intervention phase, collected 6 months after the delivery during a vaccination visit; and at post-intervention phase, collected during home visit<br><br>3) At pre- intervention and at post-intervention phase, collected at the health facility | Knowledge, attitudes and self-reported practices regarding antibiotic use and resistance                                                  |
| <b>Self -reported practice form</b>             | 1) Pregnant women<br><br>2) Mothers                                                                                                                                    | 1) At pre-intervention phase, attached to the ANC booklet and filled in on a monthly basis<br><br>2) At pre and post-intervention phase, attached to ANC booklet                                                                                                                                                            | 1) Self-reported practice on medicines used during pregnancy<br><br>2) Self-reported practice on medicines use for a child                |
| <b>Medical examination and prescribing form</b> | 1) Pregnant women<br><br>2) Mothers (children)                                                                                                                         | 1) At pre-intervention phase, during consultation with a HCP<br><br>2) At pre and post-intervention phase, during consultation with a HCP                                                                                                                                                                                   | 1) Medicines prescribed to pregnant women while seeking medical help<br><br>2) Medicines prescribed to a child while seeking medical help |
| <b>Records review form</b>                      | Pregnant women                                                                                                                                                         | Records review in the included health facilities, 12 months pre and 12 months post-intervention                                                                                                                                                                                                                             | Antibiotic administration during delivery                                                                                                 |
| <b>Key stakeholders qualitative interviews</b>  | All relevant HCPs (doctors, nurses, midwives, private providers), drug sellers and policy makers (Ministry of Health, members of professional association, university) | At pre and post-intervention phase, interviews at the workplace of key stakeholder                                                                                                                                                                                                                                          | Perceptions of HCPs and policy makers towards antibiotic administration to pregnant women, during delivery and for children under two     |
| <b>Focus group discussion</b>                   | 1) Pregnant women<br><br>2) Mothers                                                                                                                                    | 1) At pre-intervention (women selected from outside the study area)<br><br>2) At pre-intervention (women selected from outside the study area), and at post-intervention (women from the study area)                                                                                                                        | Perceptions of pregnant women and mothers regarding antibiotic use and resistance during pregnancy, delivery and for children under two   |

ANC-antenatal care; HCPs- healthcare providers.

**BMJ Open\_200508\_V[final]\_revision 6 October**

1  
2  
3  
4  
5  
6  
7  
8  
9  
10  
11  
12  
13  
14  
15  
16  
17  
18  
19  
20  
21  
22  
23  
24  
25  
26  
27  
28  
29  
30  
31  
32  
33  
34  
35  
36  
37  
38  
39  
40  
41  
42  
43  
44  
45  
46  
47  
48  
49  
50  
51  
52  
53  
54  
55  
56  
57  
58  
59  
60

Figure 1 Timeline of the project

KAP-Knowledge, attitude and practice.

For peer review only

## REFERENCES

1. Sengupta S, Chattopadhyay MK, Grossart HP. The multifaceted roles of antibiotics and antibiotic resistance in nature. *Front Microbiol.* 2013;4:47.
2. World Health Organization. Global Action Plan on Antimicrobial Resistance. 2015.
3. O'Neill J. Antimicrobial resistance: tackling a crisis for the health and wealth of nations, The review on antimicrobial resistance. 2014.
4. Heijden Mvd. When the Drugs Don't Work Antibiotic Resistance as a Global Development Problem. 2019.
5. World Health Organization. Antimicrobial resistance: global report on surveillance. 2014.
6. Stålsby Lundborg C, Tamhankar AJ. Understanding and changing human behaviour--antibiotic mainstreaming as an approach to facilitate modification of provider and consumer behaviour. *Ups J Med Sci.* 2014;119(2):125-33.
7. World Health Organization. The evolving threat of antimicrobial resistance: options for action: World Health Organization; 2012.
8. Martinez de Tejada B. Antibiotic use and misuse during pregnancy and delivery: benefits and risks. *Int J Environ Res Public Health.* 2014;11(8):7993-8009.
9. Mylonas I. Antibiotic chemotherapy during pregnancy and lactation period: aspects for consideration. *Arch Gynecol Obstet.* 2011;283(1):7-18.
10. Santos F, Oraichi D, Berard A. Prevalence and predictors of anti-infective use during pregnancy. *Pharmacoepidemiol Drug Saf.* 2010;19(4):418-27.
11. de Jonge L, Bos HJ, van Langen IM, de Jong-van den Berg LT, Bakker MK. Antibiotics prescribed before, during and after pregnancy in the Netherlands: a drug utilization study. *Pharmacoepidemiol Drug Saf.* 2014;23(1):60-8.
12. Walker WA. The importance of appropriate initial bacterial colonization of the intestine in newborn, child, and adult health. *Pediatr Res.* 2017.
13. Mackie RI, Sghir A, Gaskins HR. Developmental microbial ecology of the neonatal gastrointestinal tract. *Am J Clin Nutr.* 1999;69(5):1035S-45S.
14. World Health Organization. WHO recommendatin for prevention and treatment of maternal peripartum infections. 2015.
15. Sharma M, Sanneving L, Mahadik K, Santacatterina M, Dhaneria S, Stålsby Lundborg C. Antibiotic prescribing in women during and after delivery in a non-teaching, tertiary care hospital in Ujjain, India: a prospective cross-sectional study. *J Pharm Policy Pract.* 2013;6:9.
16. Tenover FC, McGowan JE, Jr. Reasons for the emergence of antibiotic resistance. *Am J Med Sci.* 1996;311(1):9-16.
17. Stoesser N, Xayaheuang S, Vongsouvath M, Phommason K, Elliott I, Del Ojo Elias C, et al. Colonization with Enterobacteriaceae producing ESBLs in children attending pre-school childcare facilities in the Lao People's Democratic Republic. *J Antimicrob Chemother.* 2015;70(6):1893-7.
18. Stoesser N, Crook DW, Moore CE, Phetsouvanh R, Chansamouth V, Newton PN, et al. Characteristics of CTX-M ESBL-producing *Escherichia coli* isolates from the Lao People's Democratic Republic, 2004-09. *J Antimicrob Chemother.* 2012;67(1):240-2.
19. Olaitan AO, Thongmalayvong B, Akkhavong K, Somphavong S, Paboriboune P, Khounsy S, et al. Clonal transmission of a colistin-resistant *Escherichia coli* from a domesticated pig to a human in Laos. *J Antimicrob Chemother.* 2015;70(12):3402-4.
20. The World Bank. [Available from: <https://data.worldbank.org/country/lao-pdr>.
21. The World Bank. Lao PDR Civil Registration and Vital Statistics Project Lao PDR Civil Registration and Vital Statistics Project [Available from: <http://documents.worldbank.org/curated/en/408371561720719822/pdf/Concept-Project-Information-Documents-Integrated-Safeguards-Data-Sheet-Lao-People-s-Democratic-Republic-Civil-Registration-and-Vital-Statistics-Project-P167601.pdf>.
22. Hoan IT, Chuc NT, Ottosson E, Allebeck P. Drug use among children under 5 with respiratory illness and/or diarrhoea in a rural district of Vietnam. *Pharmacoepidemiol Drug Saf.* 2009;18(6):448-53.

**BMJ Open\_200508\_V[final]\_revision 6 October**

23. Chalker J, Ratanawijitrasin S, Chuc NT, Petzold M, Tomson G. Effectiveness of a multi-component intervention on dispensing practices at private pharmacies in Vietnam and Thailand--a randomized controlled trial. *Soc Sci Med*. 2005;60(1):131-41.
24. Hoa NQ, Thi Lan P, Phuc HD, Chuc NTK, Stalsby Lundborg C. Antibiotic prescribing and dispensing for acute respiratory infections in children: effectiveness of a multi-faceted intervention for health-care providers in Vietnam. *Glob Health Action*. 2017;10(1):1327638.
25. Improvement N. Plan, Do, Study, Act (PDSA) cycles and the model for improvement [Available from: <https://improvement.nhs.uk/documents/2142/plan-do-study-act.pdf>].
26. Lester RT, Ritvo P, Mills EJ, Kariri A, Karanja S, Chung MH, et al. Effects of a mobile phone short message service on antiretroviral treatment adherence in Kenya (WelTel Kenya1): a randomised trial. *Lancet*. 2010;376(9755):1838-45.
27. Sabin LL, Bachman DeSilva M, Gill CJ, Zhong L, Vian T, Xie W, et al. Improving Adherence to Antiretroviral Therapy With Triggered Real-time Text Message Reminders: The China Adherence Through Technology Study. *J Acquir Immune Defic Syndr*. 2015;69(5):551-9.
28. Free C, Phillips G, Galli L, Watson L, Felix L, Edwards P, et al. The effectiveness of mobile-health technology-based health behaviour change or disease management interventions for health care consumers: a systematic review. *PLoS Med*. 2013;10(1):e1001362.
29. Coleman J, Bohlin KC, Thorson A, Black V, Mechael P, Mangxaba J, et al. Effectiveness of an SMS-based maternal mHealth intervention to improve clinical outcomes of HIV-positive pregnant women. *AIDS Care*. 2017;29(7):890-7.
30. REDCap (Research Electronic Data Capture) [Available from: <https://projectredcap.org/software/>].
31. Liu W, Ye S, Barton BA, Fischer MA, Lawrence C, Rahn EJ, et al. Simulation-based power and sample size calculation for designing interrupted time series analyses of count outcomes in evaluation of health policy interventions. *Contemporary clinical trials communications*. 2020;17:100474.
32. Graneheim UH, Lundman B. Qualitative content analysis in nursing research: concepts, procedures and measures to achieve trustworthiness. *Nurse Educ Today*. 2004;24(2):105-12.

**AUTHORS CONTRIBUTION**

All authors were involved in conception, planning and design of the study. AM, AS, JE, VS, CH, SK, CSL were involved in development of data collection tools. AM, AS, MV, VS, SK provided training for data collectors. AS, VS, SK recruited participants, led data collection and liaised with various stakeholders. MV, AB, MM planned for data collection and analysis of microbiological part of the study. AS and CH provided expertise in the area of obstetrics and gynaecology. GM planned for statistical analysis. JE, BK led intervention planning. AM wrote the first draft of the manuscript and made all necessary amendments after review. All co-authors (AS, JE, MV, GM, VS, CH, BK, AB, MM, SK, CSL) read the manuscript and provided critical comments and approved the final version of the manuscript. SK and CSL are PIs of the project.

**FUNDING**

This study is supported by funding from Southeast Asia Europe Joint Funding Scheme on Research and Innovation through Swedish Research Council. Grant number: 2018-01027. The project is also supported by Karolinska Institutet internal funds grant number 2018-01993

**BMJ Open\_200508\_V[final]\_revision 6 October****COMPETING INTERESTS**

The authors have no competing interest to declare for this study

**OPEN ACCESS**

This is an Open Access article distributed in accordance with the Creative Commons Attribution-Non Commercial 4.0 International (CC BY-NC 4.0) license, which permits others to distribute, remix, adapt, build upon this work non-commercially, and license their derivative works on different terms, provided the original work is properly cited and the use is non-commercial. See: <http://creativecommons.org/licenses/by-nc/4.0/>.

**PATIENT AND PUBLIC INVOLVEMENT**

Patients and the public were not involved in the design of this study.

1  
2  
3  
4  
5  
6  
7  
8  
9  
10  
11  
12  
13  
14  
15  
16  
17  
18  
19  
20  
21  
22  
23  
24  
25  
26  
27  
28  
29  
30  
31  
32  
33  
34  
35  
36  
37  
38  
39  
40  
41  
42  
43  
44  
45  
46  
47  
48  
49  
50  
51  
52  
53  
54  
55  
56  
57  
58  
59  
60

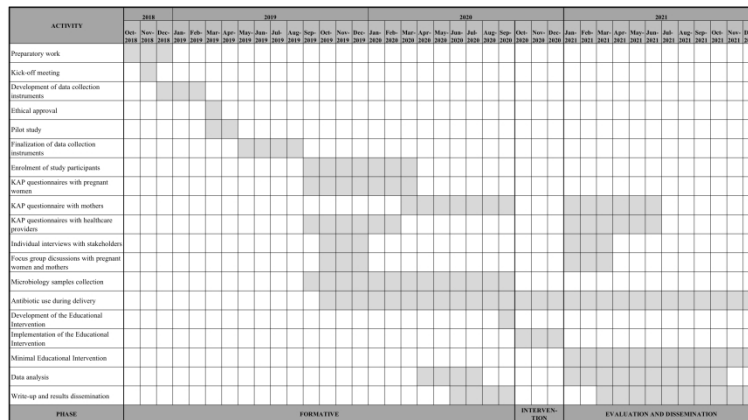

Title: Figure 1 Timeline of the project  
 Legend: KAP-Knowledge, attitude and practice.

338x190mm (300 x 300 DPI)

## BMJ Open\_CAREChild protocol\_Appendix 1

**Thematised guidelines for FGDs with pregnant women/mothers of children under two years**

## A. Introduction

1. Registration of participants.
2. Welcome and introduction of participants, moderator and assistant
3. Present the objectives, explain the selection of the participants and ask for permission to audio record the meeting
4. Obtain a written consent to participate in the study.

## B. Content

## I. Knowledge and practice regarding antibiotic use of pregnant women/mothers

1. Could you please tell us if you ever heard about antibiotics?
2. What are your thoughts and opinions about using antibiotics during pregnancy/for your child(-ren)?
3. According to you, what are the main reasons for using antibiotics during pregnancy/for your child(-ren)?

## II. Health seeking behaviour of pregnant women/mothers

1. When you need to seek for a medical help during your pregnancy/for your child(-ren)? What do you do?

## III. Knowledge regarding antibiotic resistance and side effects of antibiotics

1. Have you heard about antibiotic resistance? Could you give an example and describe?
2. What is your idea about the consequences of antibiotic resistance? Could you give an example and describe?
3. What is your idea about any other side effects of antibiotics? Could you give an example and describe?

## IV. Source of information and possible intervention

1. From what sources do you get information regarding managing infections and antibiotic use and which source of information is the most useful for you?
2. Would you like to learn more in the future about antibiotic use and treatment of infections and if you would like to learn more what would be the optimal way to receive information?

## V. Quality of the ANC service

1. For women who ever had ANC visits, what is your opinion about the service of health facility?
2. Is there anything that needs improvement during the antenatal care (ANC) visits or during the consultation with health care provider?
3. For women who had no ANC visits before, why you had no ANC visit? what is your opinion about the antenatal care? What are you going to do to get ANC visit in the future? Do you have anything more to propose?

## C. Summary and closing remarks

1. Anything that we missed and we should discuss more?

## BMJ Open\_CAREChild protocol\_Appendix 1

2. A short presentation about antibiotic use and resistance.
3. Thank you and closing the meeting

**Individual interview guide for HCPs and policy makers**

## A. Introduction

1. Registration of the participant.
2. Introduction of research team.
3. Present the objectives, explain the selection of the participants and ask for permission to audio record the meeting.
4. Obtain a written consent to participate in the study.

## B. Content

## I. Factors influencing antibiotic prescribing/dispensing/giving

1. If you prescribe/dispense/give antibiotics by yourself, what is the key factors for antibiotics prescribing/dispensing/giving to patient(s).
2. How do you decide on prescribing/dispensing/giving the antibiotic to pregnant women? during delivery? and for children?
3. For what diseases do the majority of sick children, especially children under two receive antibiotics?

## II. Source of information

1. Did you get enough health information about antibiotic treatment?
2. What do you think about the guidelines for antibiotics use during pregnancy? delivery? children under two?
3. What is your opinion about continuing professional development such as conference, training related to antibiotic use?

## III. Antibiotic resistance

1. Do you observe antibiotic resistance in your everyday practice? Please describe and give example.

## IV. Patient-doctor interaction and communication

1. How do you communicate with your patients about antibiotic use and resistance?
2. In your opinion what is patients' knowledge and experiences regarding antibiotic use?

## V. Quality of health services

1. Is there anything in the organization of ANC and/or primary health care that can be improved? Please describe and give example.

## C. Summary and closing remarks.

1. Anything that we missed and we should discuss more?
2. Thank you for the interview.
