# Supplementary material for: Containment of Antibiotic REsistance—measures to improve antibiotic use in pregnancy, childbirth and young children (CAREChild): a protocol of a prospective, quasiexperimental interventional study in Lao PDR
Source: PubMed Central journal article supplement — BMJ Open. 2020 Nov 19;10(11):e040334. doi: 10.1136/bmjopen-2020-040334 (PMC7678367; doi:10.1136/bmjopen-2020-040334), 2020-11-19
Supplement: bmjopen-2020-040334supp001.pdf [file bmjopen-2020-040334supp001.pdf]

## BMJ Open\_CAREChild protocol\_Appendix 1

**Thematised guidelines for FGDs with pregnant women/mothers of children under two years**

## A. Introduction

1. Registration of participants.
2. Welcome and introduction of participants, moderator and assistant
3. Present the objectives, explain the selection of the participants and ask for permission to audio record the meeting
4. Obtain a written consent to participate in the study.

## B. Content

## I. Knowledge and practice regarding antibiotic use of pregnant women/mothers

1. Could you please tell us if you ever heard about antibiotics?
2. What are your thoughts and opinions about using antibiotics during pregnancy/for your child(-ren)?
3. According to you, what are the main reasons for using antibiotics during pregnancy/for your child(-ren)?

## II. Health seeking behaviour of pregnant women/mothers

1. When you need to seek for a medical help during your pregnancy/for your child(-ren)? What do you do?

## III. Knowledge regarding antibiotic resistance and side effects of antibiotics

1. Have you heard about antibiotic resistance? Could you give an example and describe?
2. What is your idea about the consequences of antibiotic resistance? Could you give an example and describe?
3. What is your idea about any other side effects of antibiotics? Could you give an example and describe?

## IV. Source of information and possible intervention

1. From what sources do you get information regarding managing infections and antibiotic use and which source of information is the most useful for you?
2. Would you like to learn more in the future about antibiotic use and treatment of infections and if you would like to learn more what would be the optimal way to receive information?

## V. Quality of the ANC service

1. For women who ever had ANC visits, what is your opinion about the service of health facility?
2. Is there anything that needs improvement during the antenatal care (ANC) visits or during the consultation with health care provider?
3. For women who had no ANC visits before, why you had no ANC visit? what is your opinion about the antenatal care? What are you going to do to get ANC visit in the future? Do you have anything more to propose?

## C. Summary and closing remarks

1. Anything that we missed and we should discuss more?

## BMJ Open\_CAREChild protocol\_Appendix 1

2. A short presentation about antibiotic use and resistance.
3. Thank you and closing the meeting

**Individual interview guide for HCPs and policy makers**

## A. Introduction

1. Registration of the participant.
2. Introduction of research team.
3. Present the objectives, explain the selection of the participants and ask for permission to audio record the meeting.
4. Obtain a written consent to participate in the study.

## B. Content

## I. Factors influencing antibiotic prescribing/dispensing/giving

1. If you prescribe/dispense/give antibiotics by yourself, what is the key factors for antibiotics prescribing/dispensing/giving to patient(s).
2. How do you decide on prescribing/dispensing/giving the antibiotic to pregnant women? during delivery? and for children?
3. For what diseases do the majority of sick children, especially children under two receive antibiotics?

## II. Source of information

1. Did you get enough health information about antibiotic treatment?
2. What do you think about the guidelines for antibiotics use during pregnancy? delivery? children under two?
3. What is your opinion about continuing professional development such as conference, training related to antibiotic use?

## III. Antibiotic resistance

1. Do you observe antibiotic resistance in your everyday practice? Please describe and give example.

## IV. Patient-doctor interaction and communication

1. How do you communicate with your patients about antibiotic use and resistance?
2. In your opinion what is patients' knowledge and experiences regarding antibiotic use?

## V. Quality of health services

1. Is there anything in the organization of ANC and/or primary health care that can be improved? Please describe and give example.

## C. Summary and closing remarks.

1. Anything that we missed and we should discuss more?
2. Thank you for the interview.
